# Supplementary material
Source: PubMed Central journal article supplement (PMC7196127)
Supplement: 41422_2020_308_MOESM1_ESM.pdf [file 41422_2020_308_MOESM1_ESM.pdf]

**Accelerated evolution of an *Lhx2* enhancer shapes  
mammalian social hierarchies**

Yuting Wang, Guangyi Dai, Zhili Gu, Guopeng Liu, Ke Tang, Yi-Hsuan Pan, Yujie Chen, Xin Lin, Nan Wu, Haoshan Chen, Su Feng, Shou Qiu, Hongduo Sun, Qian Li, Chuan Xu, Yanan Mao, Yong Edward Zhang, Philipp Khaitovich, Yan-Ling Wang, Qunxiu Liu, Jing-Dong Jackie Han, Zhen Shao, Gang Wei, Chun Xu, Naihe Jing, Haipeng Li

**Supplementary text**

**Figures S1 to S15**

**Tables S1 to S10**

**SI References**

## Supplementary Information Text

### **Motor Coordination, Balance**

Results of the rota-rod test<sup>1</sup> revealed that no significant difference in motor coordination and balance between PAS1<sup>c/c</sup> and PAS1<sup>c/m</sup>, and between PAS1<sup>/m</sup> and PAS1<sup>-/-</sup> male mice (Two-tailed permutation test,  $P = 0.914$ , and  $0.394$ , respectively) (Supplementary information, Fig. S13). However, a significant difference in motor coordination and balance was observed between PAS1<sup>w/m</sup> and PAS1<sup>w/w</sup> male mice (Two-tailed permutation test,  $P = 0.030$ ). Results of the pole test<sup>2</sup> showed that all 3 pairs of male mice had no significant difference in motor coordination and balance (Supplementary information, Fig. S13) (Two-tailed permutation test,  $P = 0.972$ ,  $0.076$ , and  $0.996$ , respectively).

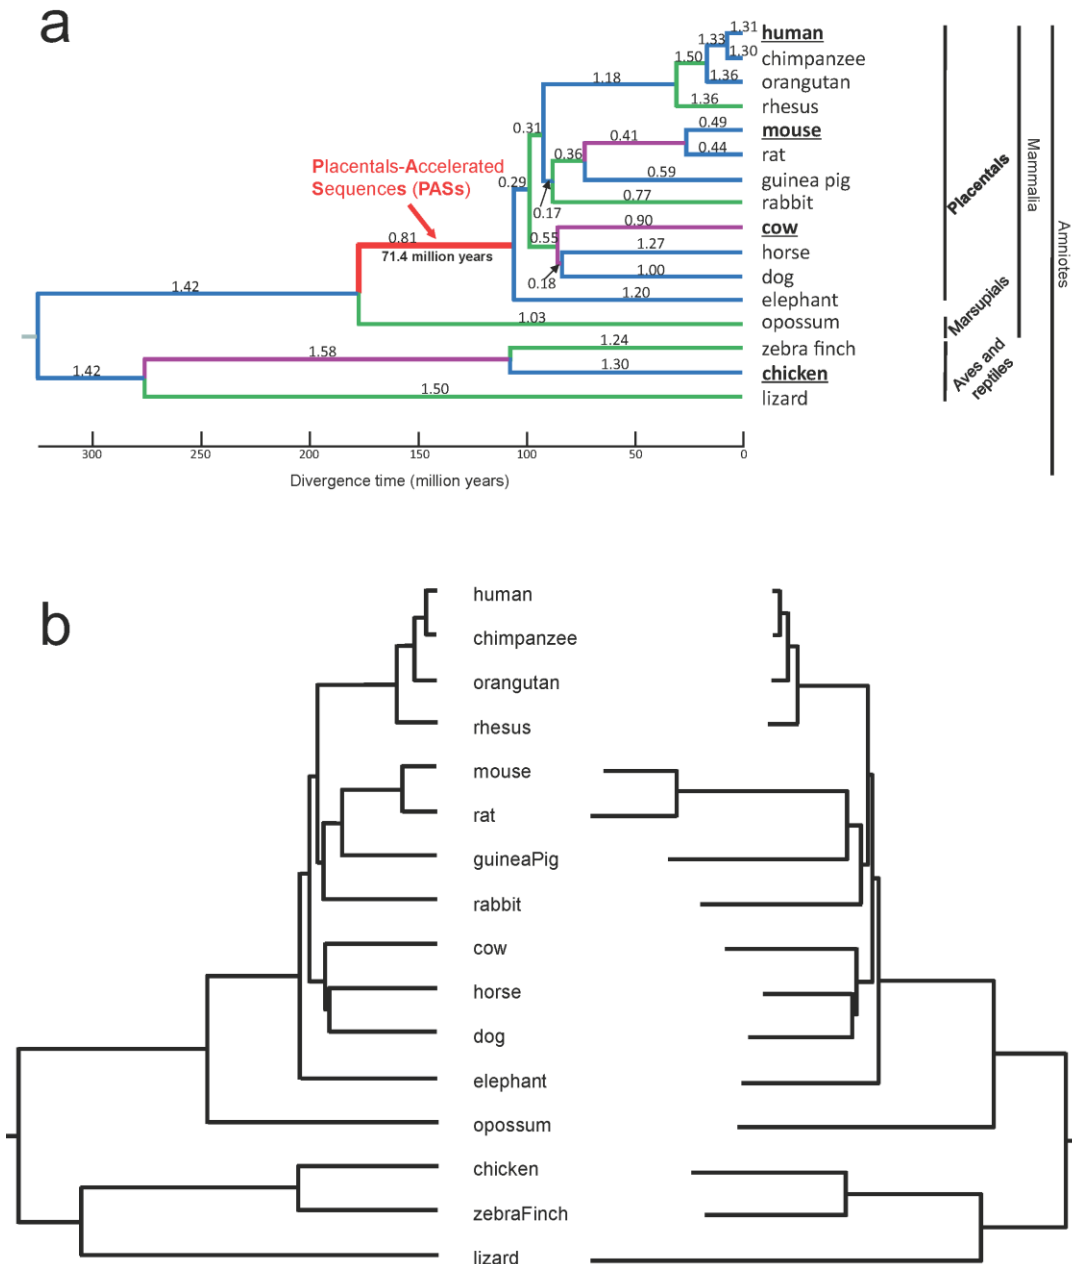

Fig. S1. Phylogenetic tree of 16 amniotes for studying placental-accelerated sequences (PASs).

(a) The branch sets of tree and the branch-specific normalization factors. Connected branches with the same color (excluding the red branch) were considered as a branch set. There were 17 branch sets. The average evolutionary rate of each window in each branch set was calculated. The local evolutionary rate of the  $i$ -th branch was normalized by the branch-specific normalization factor  $\alpha_i$ .  $\alpha_i$  was shown above the branch. The normalization factors are larger than 1.0 for primates and smaller than 1.0 for rodents, consistent with the previous conclusions of slow-evolving primates and fast-evolving rodents.<sup>3</sup>

(b) Comparison between the original phylogenetic tree (left) and the reconstructed neighbor-joining tree<sup>4</sup> based on the genome-wide alignments using the eGPS software (right).<sup>5</sup>

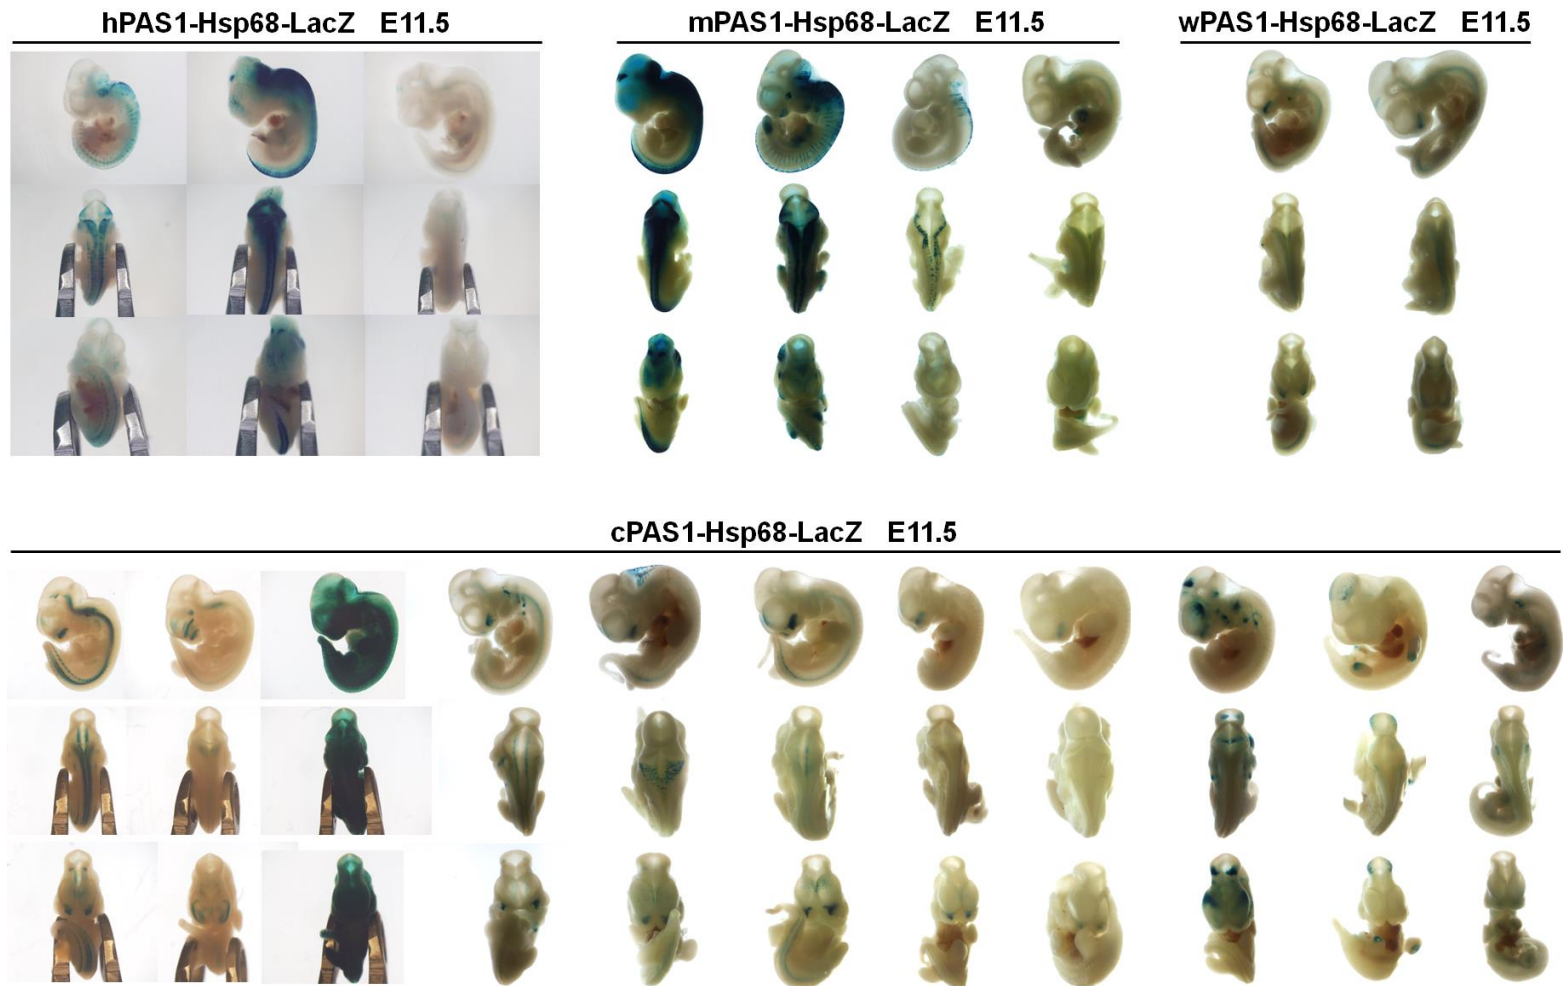

Fig. S2. LacZ-positive E11.5 embryos from hPAS1, mPAS1, wPAS1, and cPAS1 transgenic mouse enhancer assays. Lateral (upper), dorsal (middle), and ventral (bottom) views of all embryos are shown. The second mPAS1-Hsp68-LacZ embryo, the first wPAS1-Hsp68-LacZ embryo, and the sixth cPAS1-Hsp68-LacZ embryo were presented in Figure 2c.

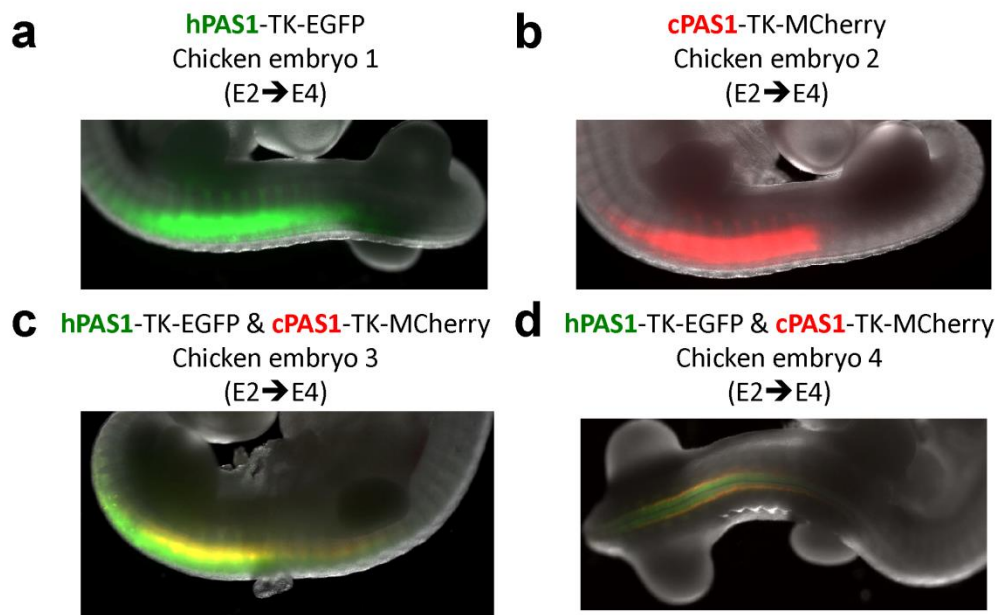

Fig. S3. Effect of hPAS1 and cPAS1 on the expression of the fluorescent protein gene in the spinal cord of chicken embryo.

(a) and (b): E4 chicken embryos after electroporation of hPAS1-TK-EGFP (green) or cPAS1-TK-mCherry (red) plasmid into the neural tube of E2 chicken embryos. Both EGFP and mCherry fluorescence signals were detected in the spinal cord of chicken embryos.

(c) and (d): Co-expression of EGFP (green) and mCherry (red) in the neural tube of chicken embryos after electroporation of hPAS1-TK-EGFP and cPAS1-TK-mCherry plasmids at 1:1 ratio.

(a, b, c) lateral view (d) dorsal view. The TK promoter is a minimal promoter and does not drive the expression of the reporter genes without an enhancer.

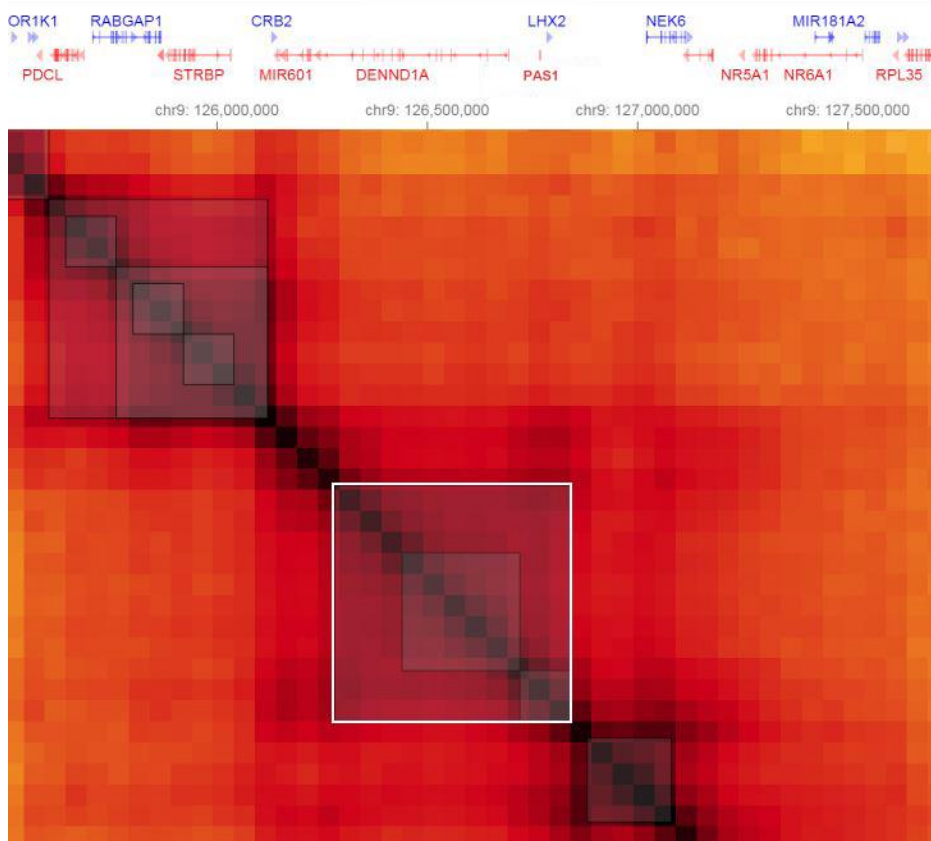

Fig. S4. Identification of topologically associating domain (TAD) around PAS1. The TAD was determined by TADTree,<sup>6</sup> and indicated with an empty square. The TAD was taken as the boundary of the region to which PAS1 may act. Data were obtained from.<sup>7</sup>

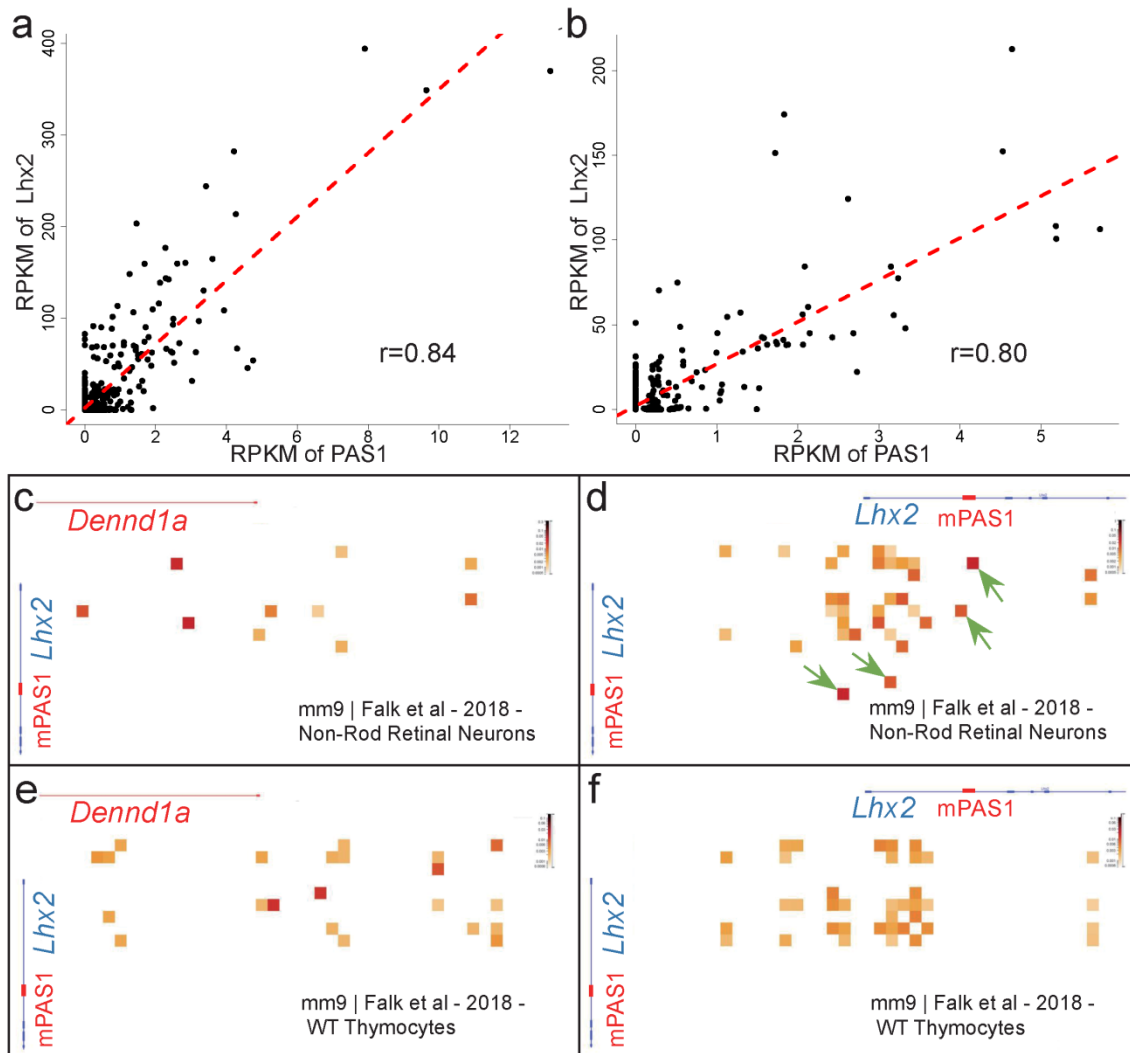

Fig. S5. Evidences for PAS1 regulating the expression of the *Lhx2* gene.

(a) Positive correlation between the CAGE signals of PAS1 and *Lhx2* expression in mouse samples.  $P < 2.2 \times 10^{-16}$ . The publicly available data were obtained from FANTOM. RPKM: Reads per kilobase per million mapped reads.

(b) Positive correlation between the CAGE signals of PAS1 and *Lhx2* expression in human samples.  $P < 2.2 \times 10^{-16}$ . The publicly available data were obtained from FANTOM. RPKM: Reads per kilobase per million mapped reads.

(c) – (f) Hi-C signals of PAS1 and *Lhx2* TSS in different mouse cell lines.<sup>8</sup> Hi-C signals (green arrow heads) were observed on PAS1 and *Lhx2*, but not on PAS1 and *Dennd1a* (C, and D); No Hi-C signal was detected in non-neural cells (E, and F)

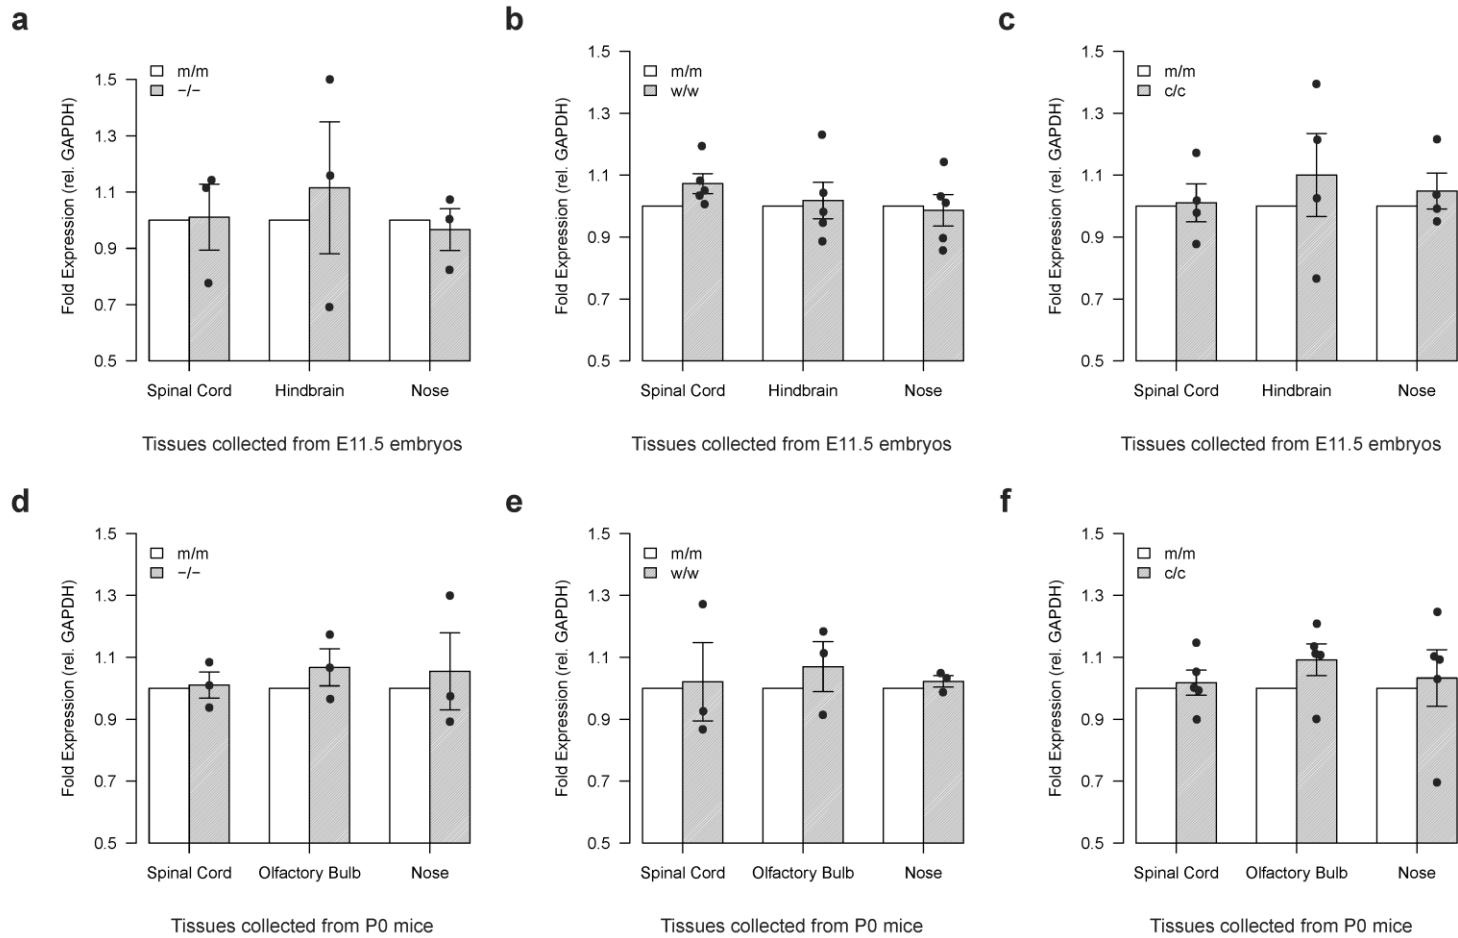

Fig. S6. mRNA levels of *Dennd1a* in E11.5 embryos (a–c) and P0 (d–f) of *PAS1*<sup>-/-</sup>, *PAS1*<sup>w/w</sup> and *PAS1*<sup>c/c</sup> mice compared with those of wide-type littermates. mRNA levels of *Dennd1a* determined by RT-qPCR were normalized to those of *Gapdh*. Error bars represent the s.e.m of at least three biological replicates and three technical replicates for each experiment.



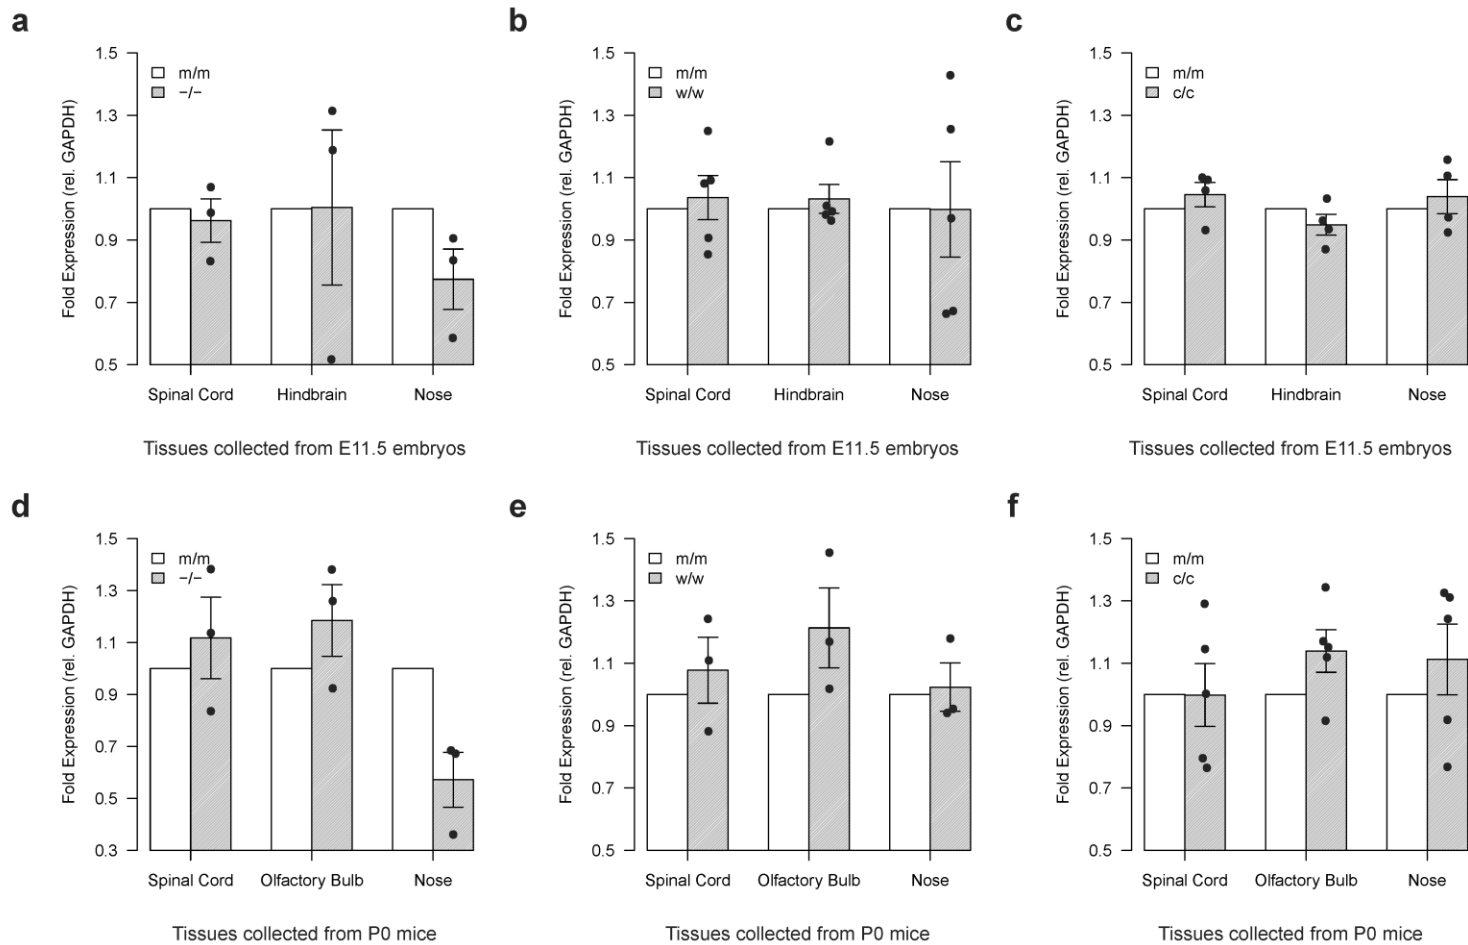

Fig. S7. mRNA levels of *Gm27197* in E11.5 embryos(a-c) and P0(d-f) of *PAS1*<sup>-/-</sup>, *PAS1*<sup>w/w</sup>, *PAS1*<sup>c/c</sup> mice compared with those of wide-type littermates. mRNA levels of *Gm27197* determined by RT-qPCR were normalized to those of *Gapdh* gene. Error bars represent the s.e.m from at least three biological replicates with three technical replicates for each experiment.

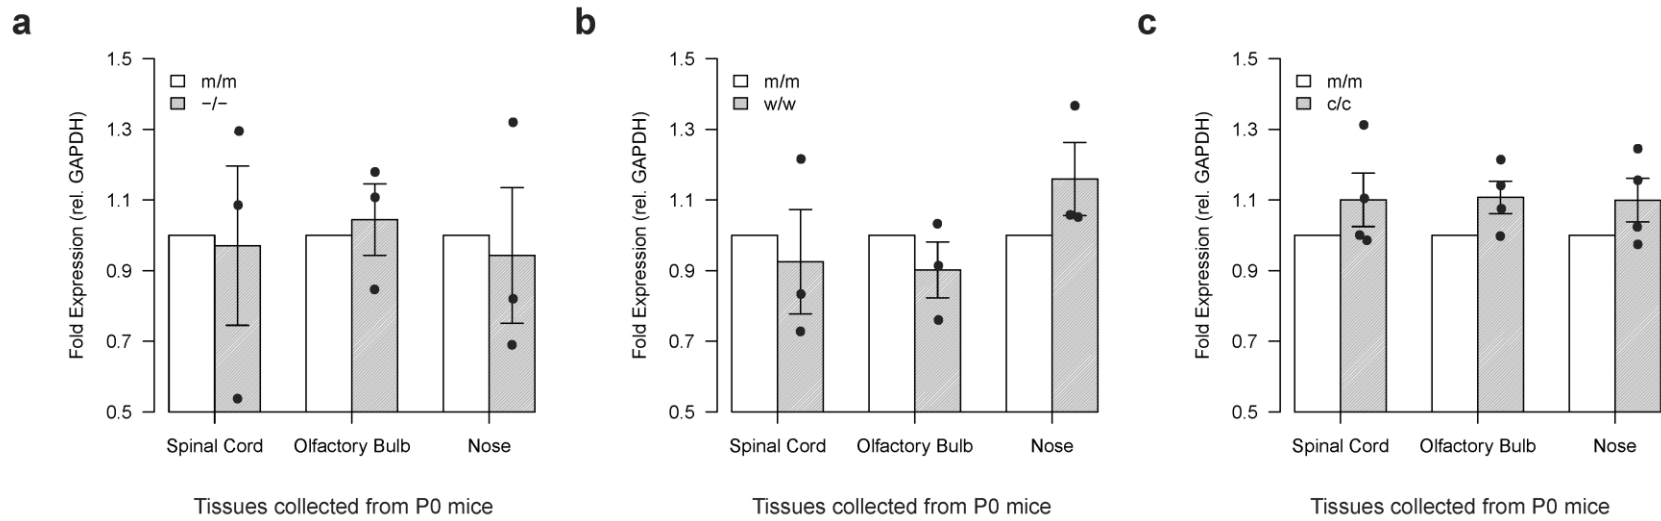

Fig. S8. *Lhx2* mRNA levels determined by RT-qPCR in P0 of  $PAS1^{-/-}$ ,  $PAS1^{w/w}$  and  $PAS1^{c/c}$  mice compared with those of wide-type littermates. *Lhx2* mRNA levels were normalized to those of *Gapdh*. Error bars represent the s.e.m of at least three biological replicates (three for  $PAS1^{-/-}$ , three for  $PAS1^{w/w}$ , four for  $PAS1^{c/c}$ ) and three technical replicates for each experiment.

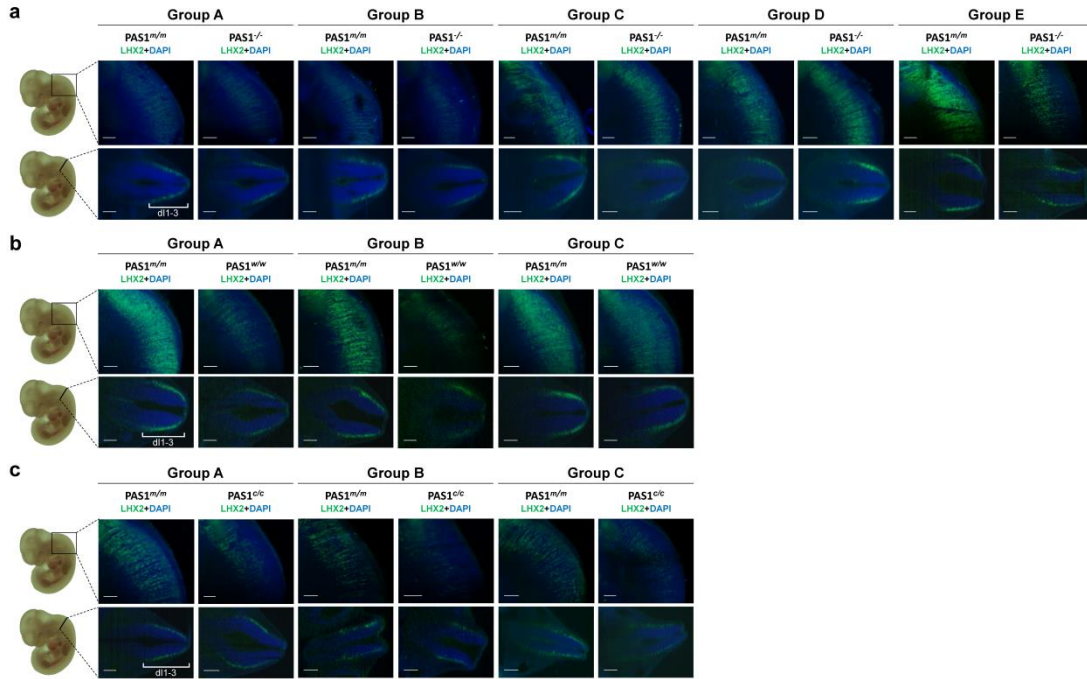

Fig. S9. Effect of PAS1s on the expression of *Lhx2* in the primitive spinal cord. E11.5  $PAS1^{-/-}$ ,  $PAS1^{w/w}$ ,  $PAS1^{c/c}$  and wild-type mouse embryos were immuno-stained for LHX2 (green) after CUBIC clearing. The region in which *Lhx2* was expressed in the wild-type ( $PAS1^{m/m}$ ) embryo is marked (dII-3, three neuronal cell types).<sup>9</sup> For each mouse strain, at least three groups of embryos were examined. Each group of embryos had two age-matched littermates of specific PAS1 genotypes. Scale bar, 200  $\mu\text{m}$ .

(a) Five groups of  $PAS1^{m/m}$  and  $PAS1^{-/-}$  pair.

(b) Three groups of  $PAS1^{m/m}$  and  $PAS1^{w/w}$  pair. The  $PAS1^{m/m}$  embryo in Group A was used in Figure 3H as the wild-type control.

(c) Three groups of  $PAS1^{m/m}$  and  $PAS1^{c/c}$  pair.

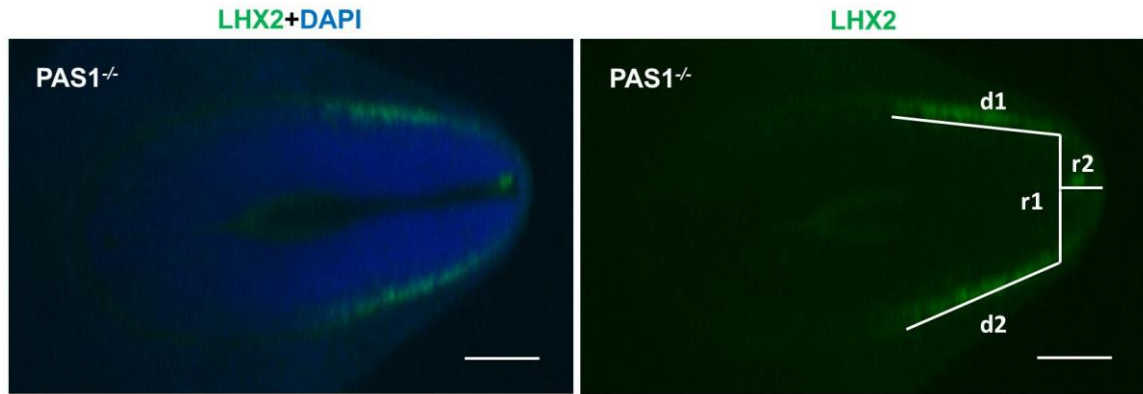

Fig. S10. Schematic of four summary statistics used for examination of LHX2 expression in spinal cord sections. d1 and d2 define the width of the areas in which the LHX2 protein was expressed, r1 and r2 denote the distances of the areas with LHX2 protein expression away from the dorsal vertex of the spinal cord. Scale bar, 200  $\mu$ m.

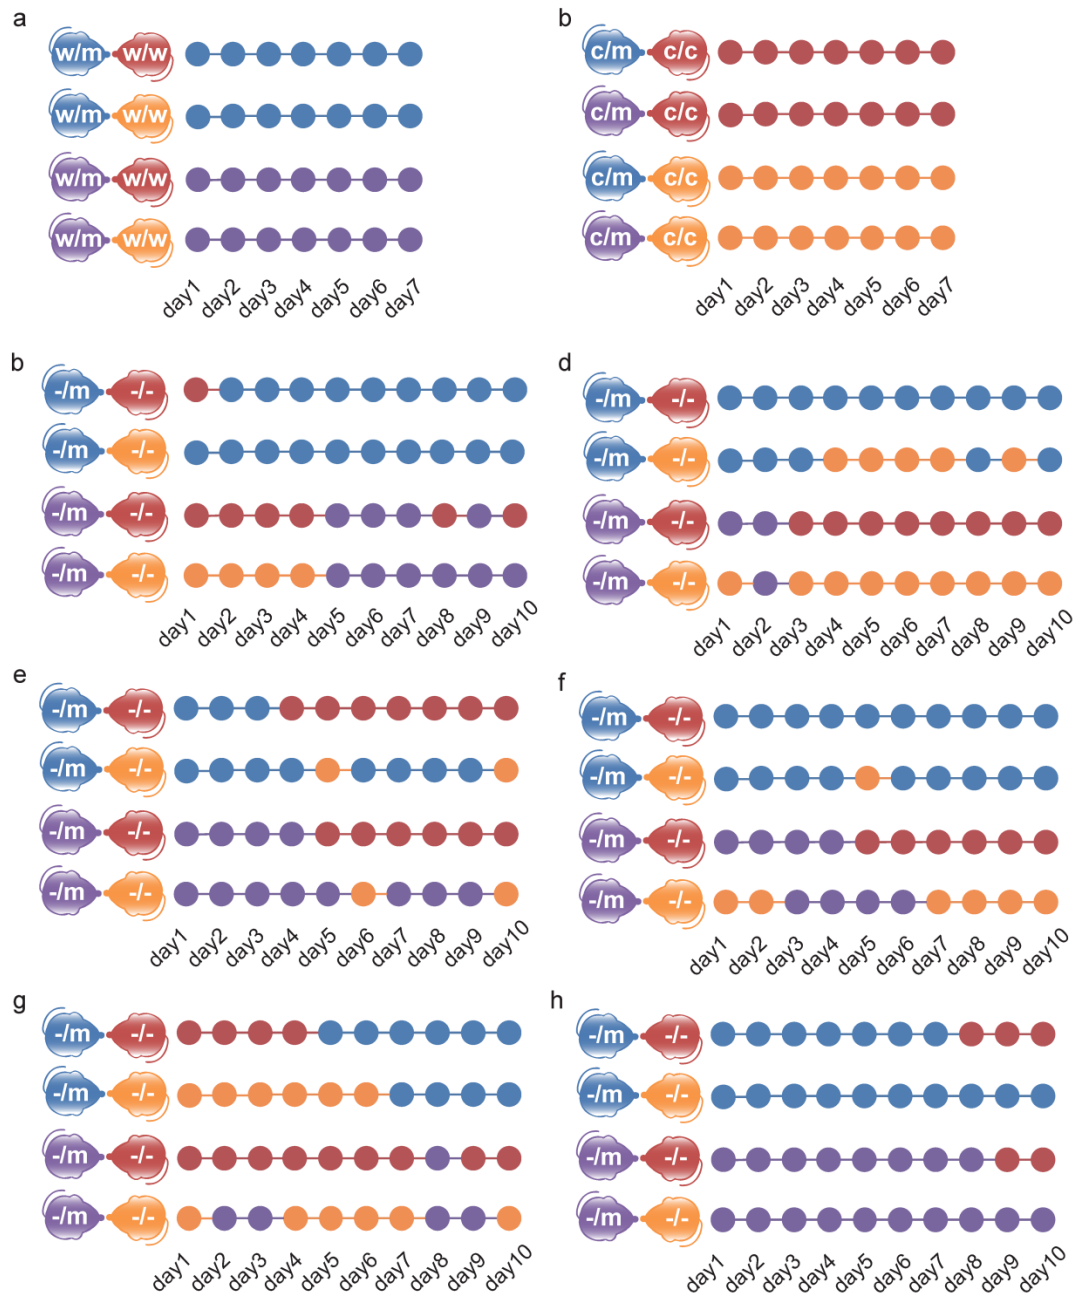

Fig. S11. Stability of tube test ranks.

The social dominance tube test was performed daily for 7 to 10 consecutive days. The winner of each test is indicated with a colored dot, which represents a specific *PAS1* genotype of the mice tested. Day1 indicates the first tube test trial after the three-day training. Please note that we applied the tube test only to cage mice living together for at least 2 weeks (Table S5-7).

(a) Tests of *PAS1*<sup>w/m</sup> vs. *PAS1*<sup>w/w</sup> male mice. All winners were of the *PAS1*<sup>w/m</sup> genotype.

(b) Tests of *PAS1*<sup>c/m</sup> vs. *PAS1*<sup>c/c</sup> male mice. All winners were of the *PAS1*<sup>c/c</sup> genotype.

(c, d, e, f, g, h) Tests of *PAS1*<sup>-/m</sup> vs. *PAS1*<sup>-/-</sup> male mice. The genotype of the winner varied.

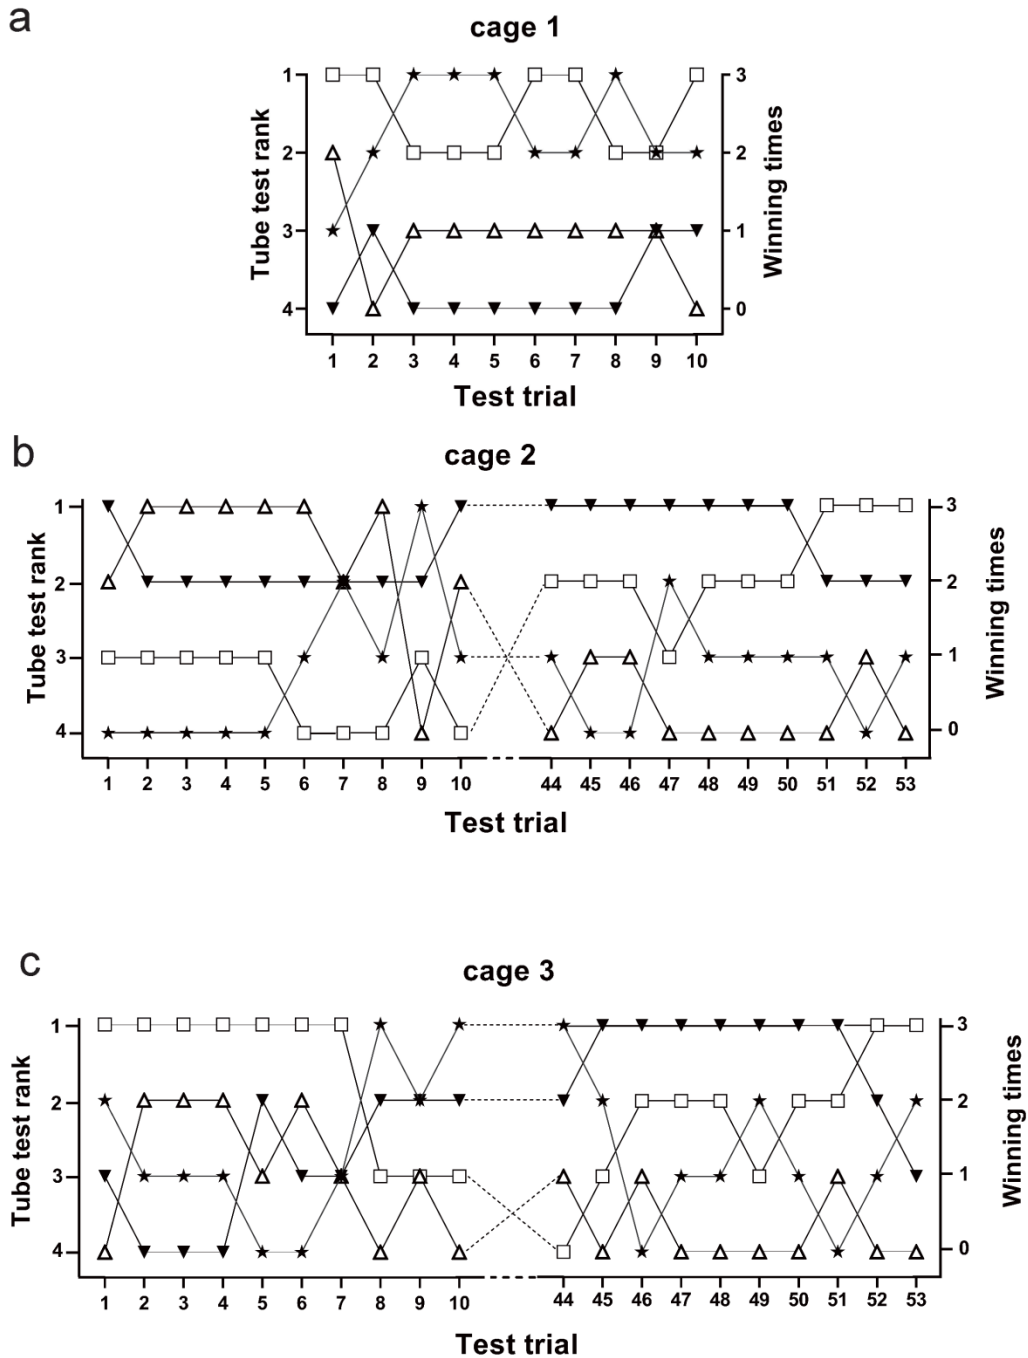

Fig. S12.  $PAS1^{-/-}$  male mice lack social stratification.

The detailed information of  $PAS1^{-/-}$  mice caged together was provided in Table S8.

(a) The social dominance tube test was performed daily for 10 consecutive days.

(b, c) The social dominance tube test was performed 20 times (once per day) within 53 consecutive days.

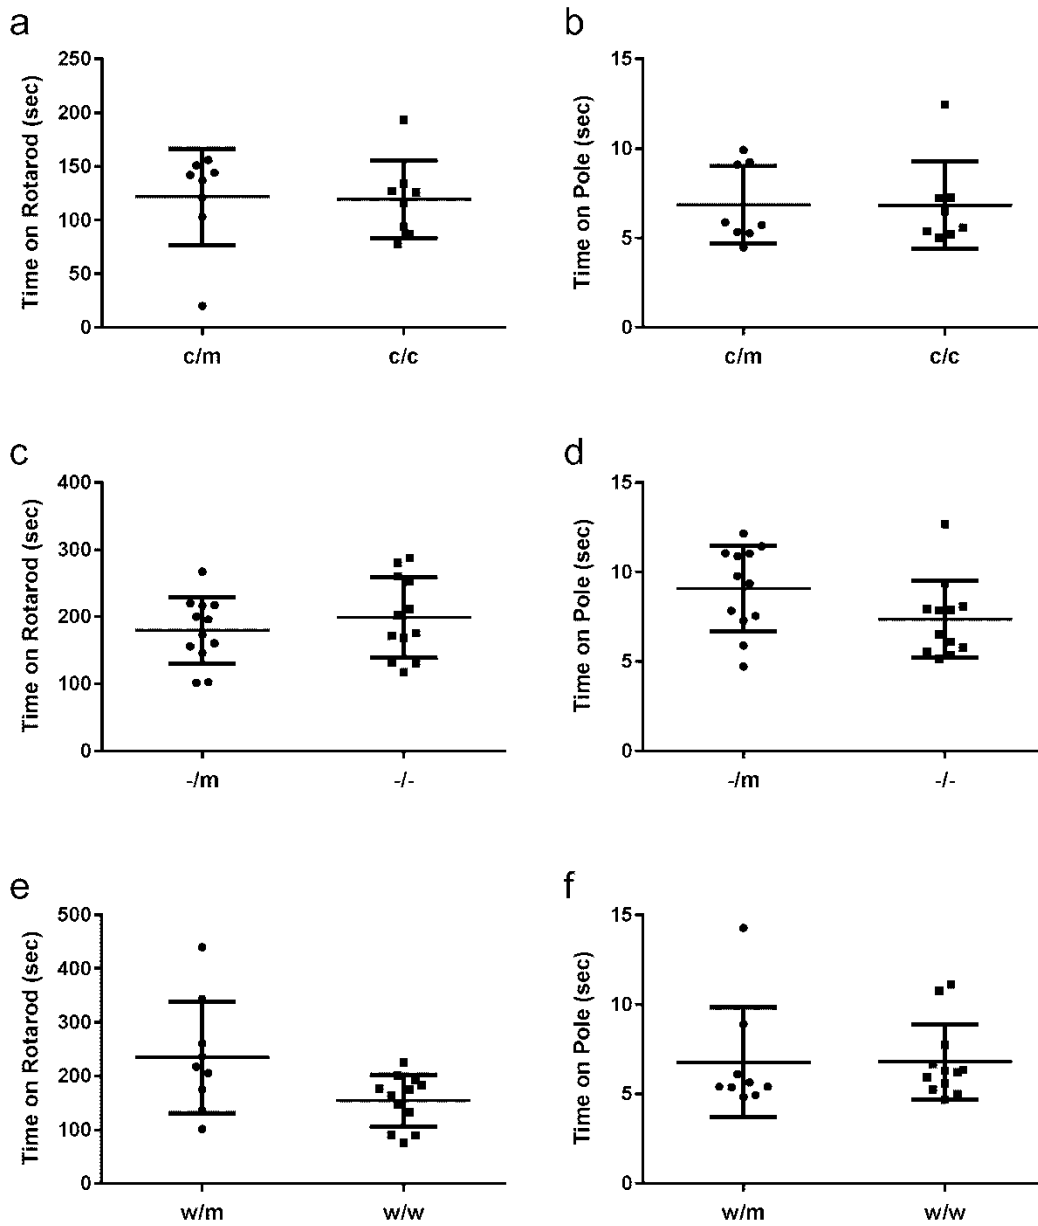

Fig. S13. Motor and activity tests. Data are presented as mean  $\pm$ SD.

- (a) Rota-rod tests of  $PAS1^{c/m}$  ( $n=8$ ) and  $PAS1^{c/c}$  ( $n=8$ ) mice.
- (b) Pole tests of  $PAS1^{c/m}$  ( $n=8$ ) and  $PAS1^{c/c}$  ( $n=8$ ) mice
- (c) Rota-rod tests of  $PAS1^{-/m}$  ( $n=12$ ) and  $PAS1^{-/-}$  ( $n=12$ ) mice.
- (d) Pole tests of  $PAS1^{-/m}$  ( $n=12$ ) and  $PAS1^{-/-}$  ( $n=12$ ) mice.
- (e) Rota-rod tests of  $PAS1^{w/m}$  ( $n=9$ ) and  $PAS1^{w/w}$  ( $n=12$ ) mice.
- (f) Pole tests of  $PAS1^{w/m}$  ( $n=9$ ) and  $PAS1^{w/w}$  ( $n=12$ ) mice.

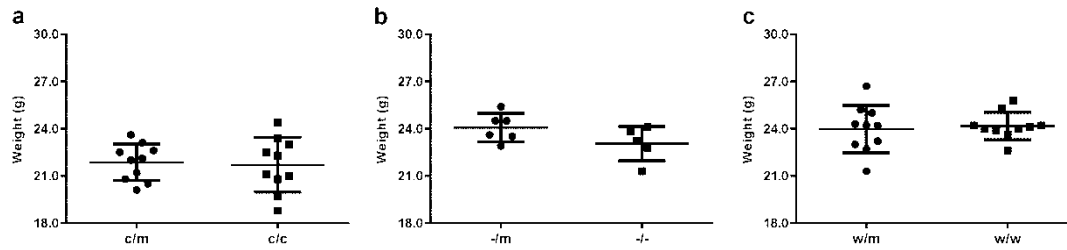

Fig. S14. Body weight of mice at two months (before group-housing). Data are presented as mean  $\pm$ SD.

(a) Body weight of PAS1<sup>c/m</sup> ( $n=10$ ) and PAS1<sup>c/c</sup> mice ( $n=10$ ) at 9.0-10.0 weeks of age. One-way analysis of variance  $P = 0.822$ .

(b) Body weight of PAS1<sup>-/m</sup> ( $n=6$ ) and PAS1<sup>-/-</sup> mice ( $n=5$ ) at 9.4-10.4 weeks of age. One-way analysis of variance  $P = 0.122$ .

(c) Body weight of PAS1<sup>w/m</sup> ( $n=10$ ) and PAS1<sup>w/w</sup> mice ( $n=10$ ) at 9.5-10.5 weeks of age. One-way analysis of variance  $P = 0.734$ .



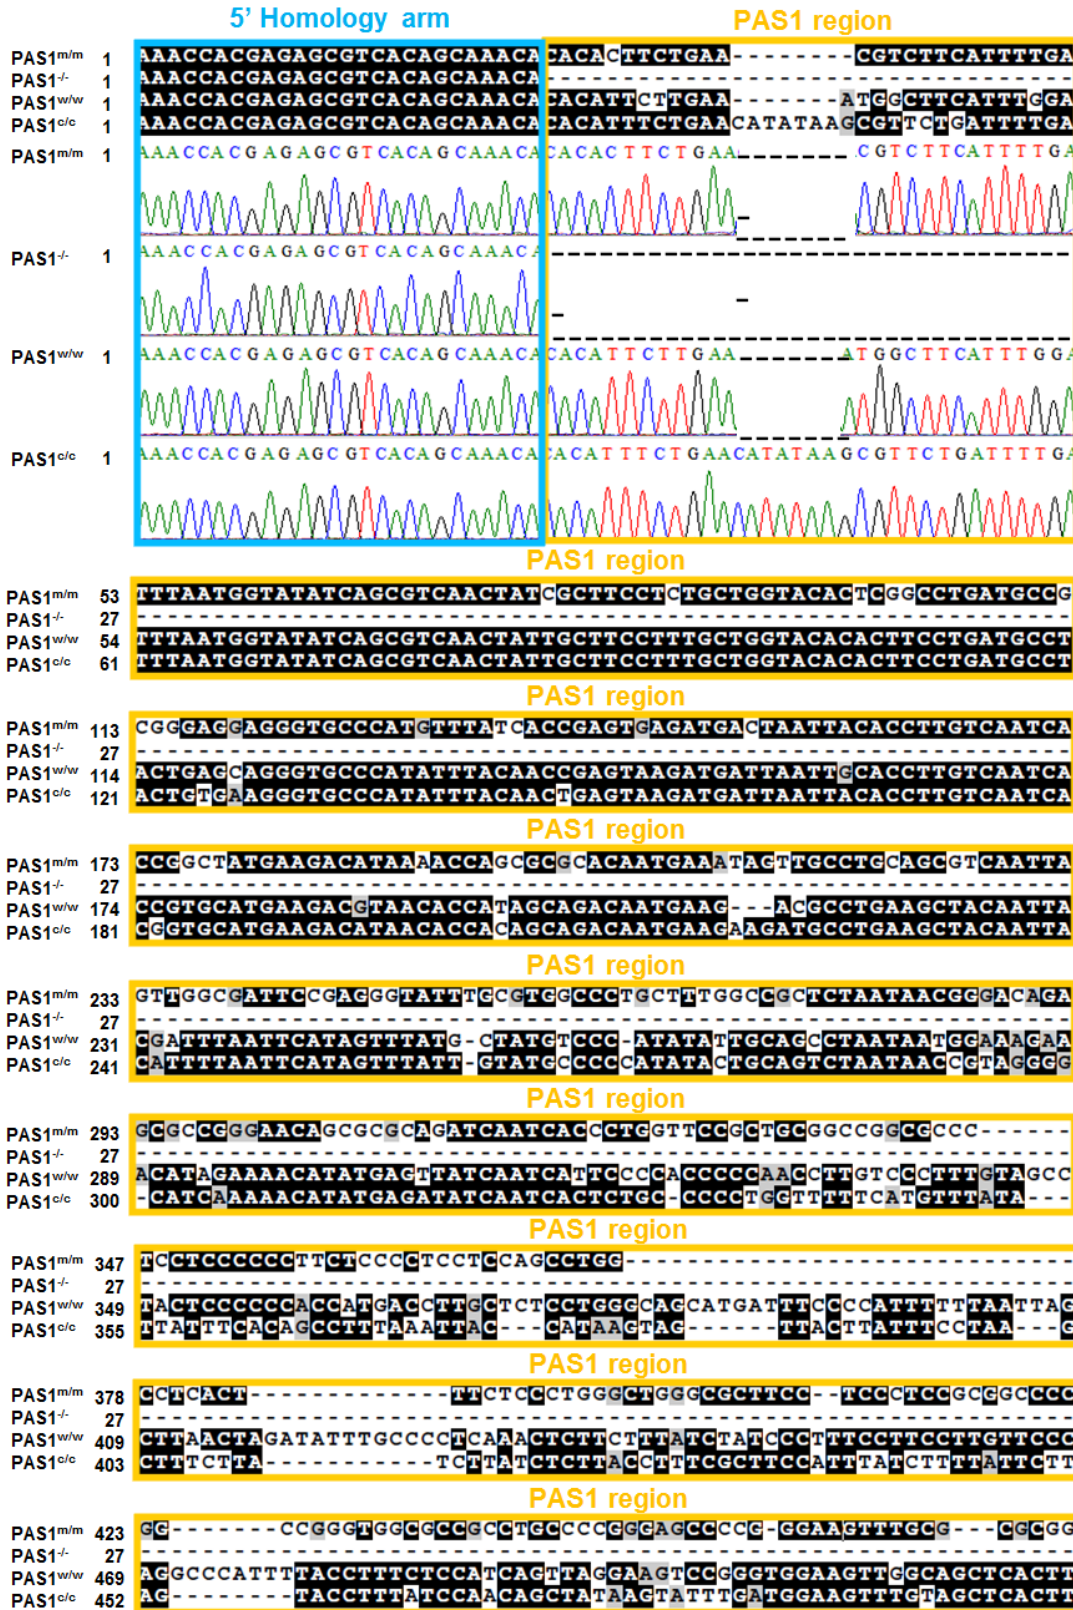

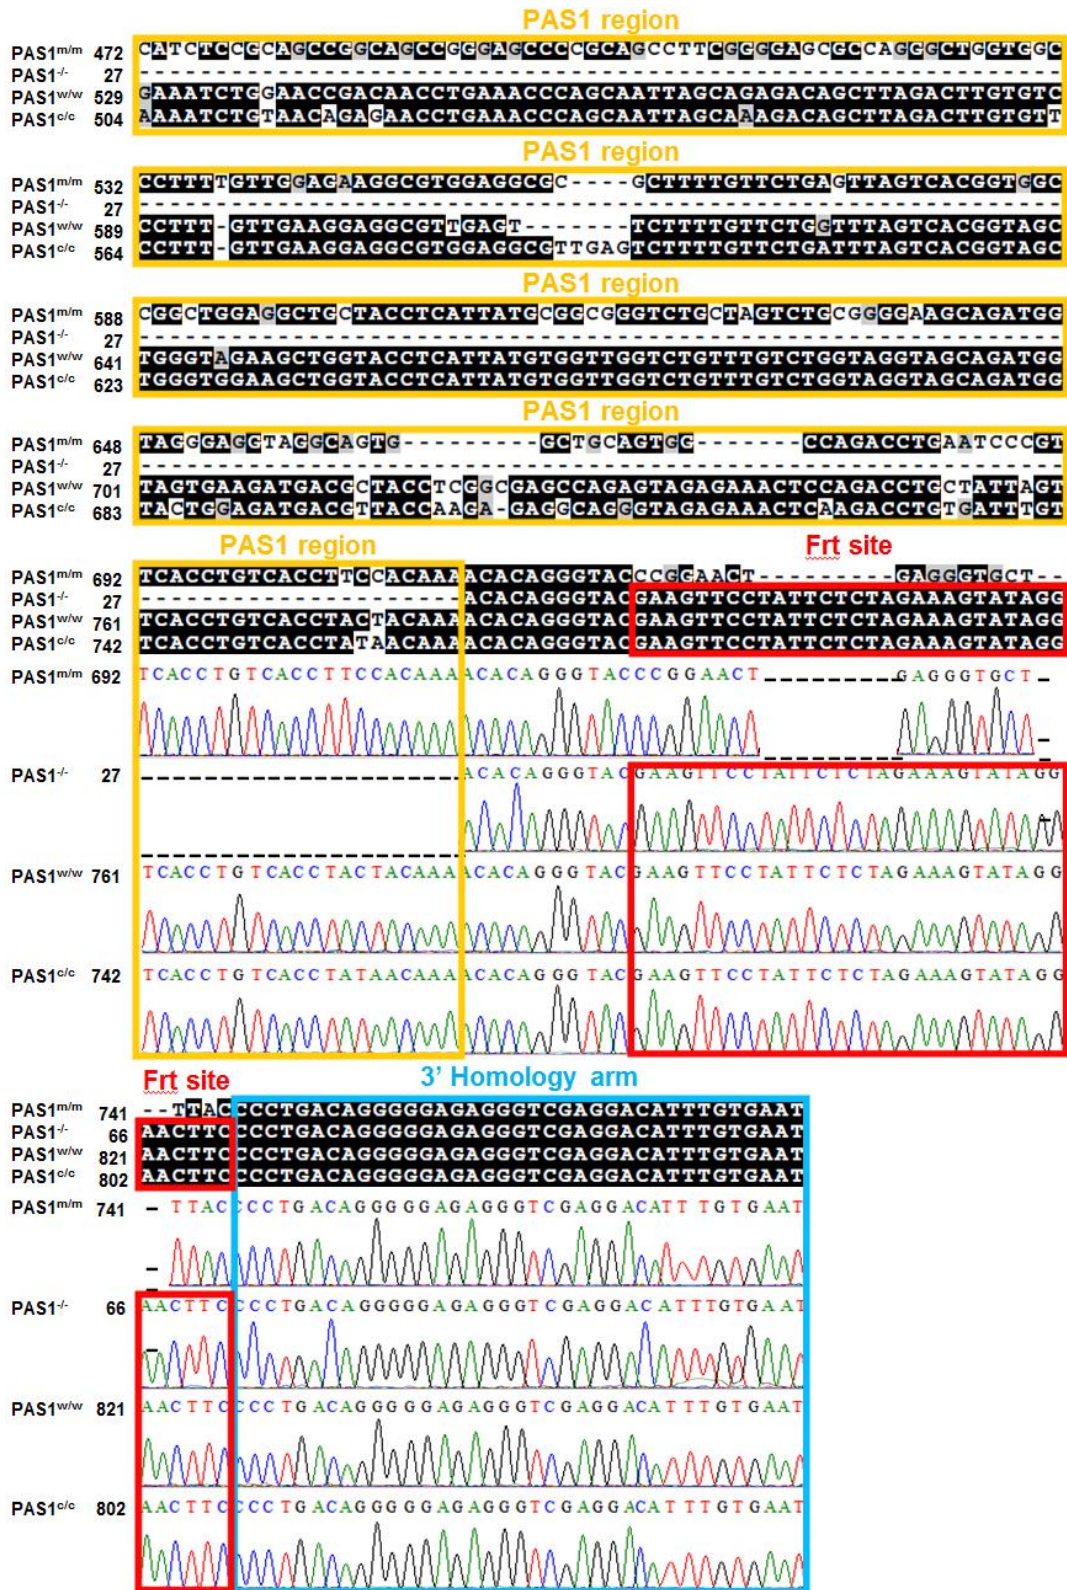

Fig. S15. Alignments of nucleotide sequences of *PAS1<sup>m/m</sup>* (wild-type), *PAS1<sup>-/-</sup>*, *PAS1<sup>w/w</sup>* and *PAS1<sup>c/c</sup>* mice.

Table S1. List of the accelerated regions in the ancestral lineage of placental mammals. Genomic locations of accelerated regions and the most adjacent protein coding genes were determined by searching the Ensembl/Havana database (GRCh37). The threshold of  $P$ -values was  $3.06 \times 10^{-9}$  after Bonferroni correction. H3K27ac signals<sup>10</sup> within 30-kb regions were obtained from ENCODE/LICR on the UCSC genome browser with a vertical viewing range of [0.2, 10]. The accelerated regions are marked with inverted triangle, located in the middle of the 30-kb regions. Median gene expression levels in 51 tissues and 2 cell lines, based on RNA-seq data of 8,555 tissue samples from 570 adult post-mortem individuals from the NIH Genotype-Tissue Expression (GTEx) project (V6, October 2015),<sup>11</sup> were visualized with UCSC genome browser. GTEx gene expression levels were log-transformed. Green circle – Passed related filters; Black circle – Failed to pass related filters.

| Rank | Coordinates                                                  | Genomic Location | Closest Coding Genes | $P$ -value             | Active enhancer signal (H3K27ac) in whole mouse brain E14.5 | GTEx Gene Expression in 53 adult human tissues (Brain in yellow) |
|------|--------------------------------------------------------------|------------------|----------------------|------------------------|-------------------------------------------------------------|------------------------------------------------------------------|
| 1    | hg19 chr9:126770941-126771040<br>mm9 chr2:38203835-38203933  | Non-coding       | <i>Lhx2</i>          | $3.15 \times 10^{-18}$ |                                                             |                                                                  |
| 2    | hg19 chr9:126770921-126771020<br>mm9 chr2:38203815-38203913  | Non-coding       | <i>Lhx2</i>          | $5.94 \times 10^{-18}$ |                                                             |                                                                  |
| 3    | hg19 chr9:126770901-126771000<br>mm9 chr2:38203795-38203894  | Non-coding       | <i>Lhx2</i>          | $7.14 \times 10^{-18}$ |                                                             |                                                                  |
| 4    | hg19 chr9:126770961-126771060<br>mm9 chr2:38203855-38203953  | Non-coding       | <i>Lhx2</i>          | $2.77 \times 10^{-18}$ |                                                             |                                                                  |
| 5    | hg19 chr11:8310741-8310840<br>mm9 chr2:160352318-160352420   | intergenic       | <i>Lmo1</i>          | $9.63 \times 10^{-13}$ |                                                             |                                                                  |
| 6    | hg19 chr9:126771021-126771120<br>mm9 chr2:38203914-38204013  | Non-coding       | <i>Lhx2</i>          | $1.92 \times 10^{-12}$ |                                                             |                                                                  |
| 7    | hg19 chr20:39498201-39498300<br>mm9 chr2:160352318-160352420 | intergenic       | <i>Top1</i>          | $2.78 \times 10^{-11}$ |                                                             |                                                                  |
| 8    | hg19 chr9:126770601-126770700<br>mm9 chr2:38203489-38203588  | Non-coding       | <i>Lhx2</i>          | $8.28 \times 10^{-11}$ |                                                             |                                                                  |
| 9    | hg19 chr20:57485821-57485920<br>mm9 chr2:174171826-174171924 | coding           | <i>Gnas</i>          | $1.26 \times 10^{-10}$ |                                                             |                                                                  |
| 10   | hg19 chr9:126770541-126770640<br>mm9 chr2:38203429-38203528  | Non-coding       | <i>Lhx2</i>          | $3.15 \times 10^{-10}$ |                                                             |                                                                  |
| 11   | hg19 chr9:126770641-126770740<br>mm9 chr2:38203529-38203629  | Non-coding       | <i>Lhx2</i>          | $3.84 \times 10^{-10}$ |                                                             |                                                                  |
| 12   | hg19 chr3:71113981-71114080<br>mm9 chr6:98978164-98978259    | intronic         | <i>Foxp1</i>         | $5.27 \times 10^{-10}$ |                                                             |                                                                  |
| 13   | hg19 chr3:71114041-71114140<br>mm9 chr6:98978223-98978313    | intronic         | <i>Foxp1</i>         | $5.48 \times 10^{-10}$ |                                                             |                                                                  |
| 14   | hg19 chr4:1804621-1804720                                    | coding           | <i>Fgfr3</i>         | $5.95 \times 10^{-10}$ |                                                             |                                                                  |

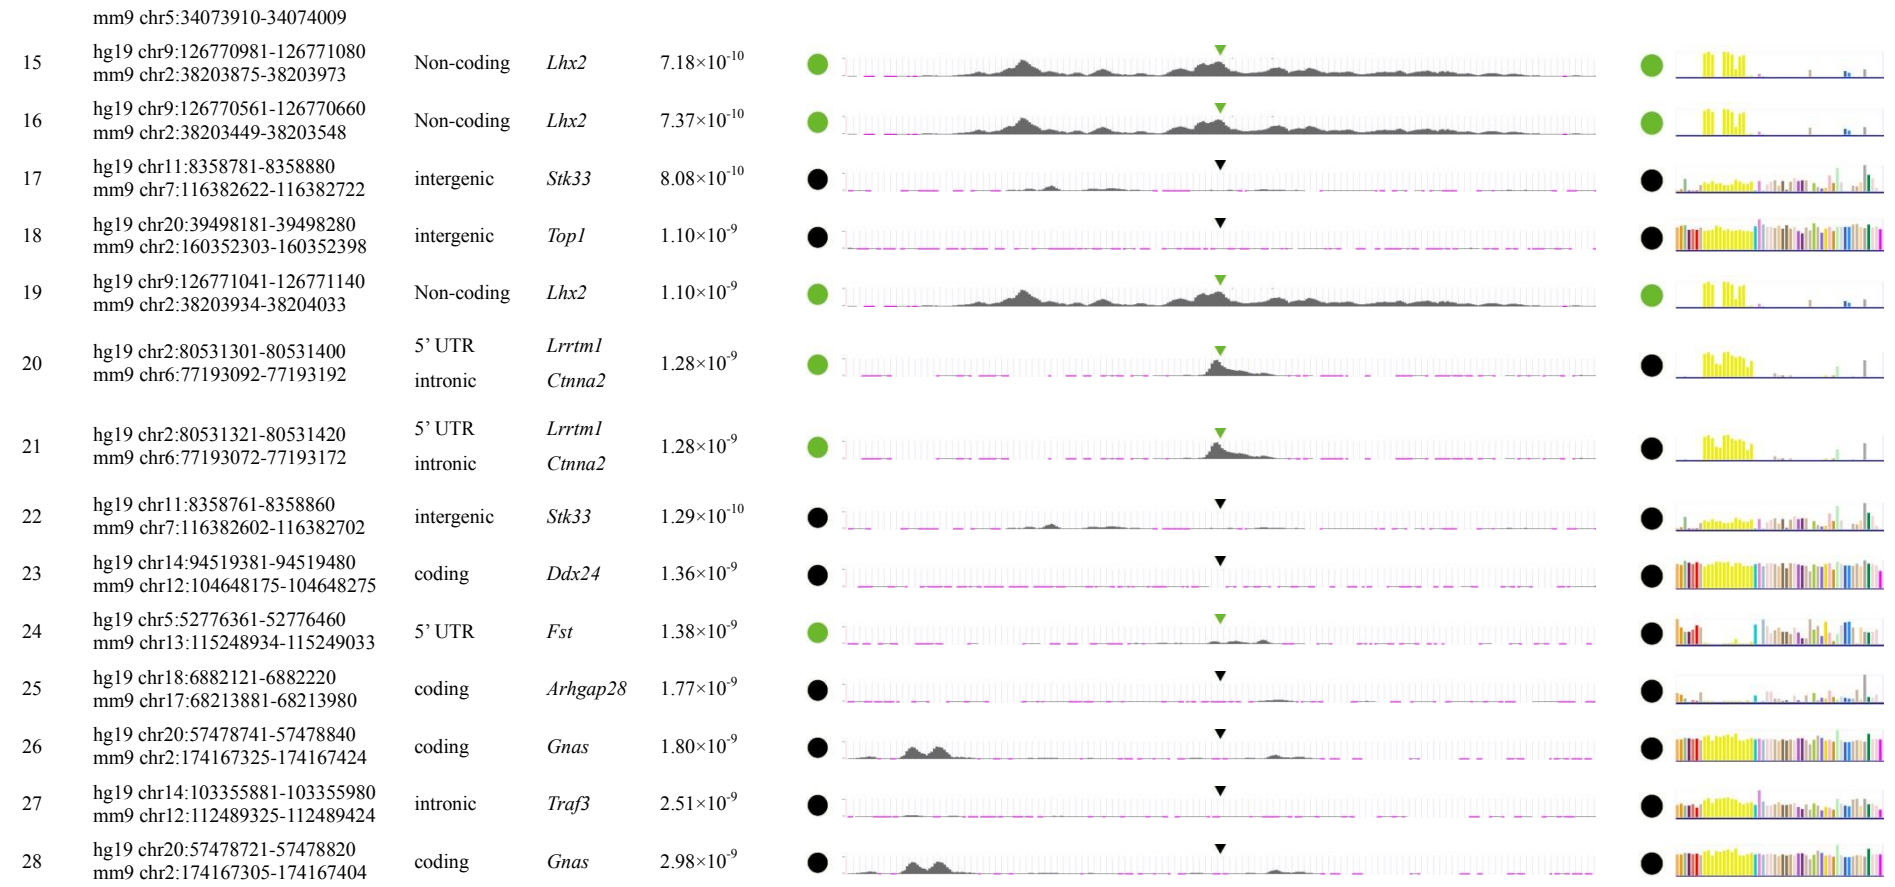

Table S2. Summary statistics of *Lhx2* gene expression levels in spinal cord sections of PAS1<sup>-/-</sup> E11.5 mouse embryos. Images of spinal cord sections of E11.5 PAS1<sup>m/m</sup> (wild-type) and PAS1<sup>-/-</sup> embryos immuno-stained for LHX2 after CUBIC clearing were captured and analyzed with the Vision4D software (version 2.12.3, Arivis). Five groups of embryos were examined, and each group of embryos was from age-matched littermates. Three consecutive sections of each embryo were examined. d1 and d2 define the width of the areas with LHX2 protein expression. r1 and r2 denote the distances of the areas with LHX2 protein expression away from the dorsal vertex of the spinal cord. Measurements were conducted by two experts independently, and results are presented in the following two sub-tables. Two-tailed permutation test was used, \**P* < 0.05, \*\**P* < 0.01.

|                         |          | Group A             |                     | Group B             |                     | Group C             |                     | Group D             |                     | Group E             |                     | P-value           |
|-------------------------|----------|---------------------|---------------------|---------------------|---------------------|---------------------|---------------------|---------------------|---------------------|---------------------|---------------------|-------------------|
|                         |          | PAS1 <sup>m/m</sup> | PAS1 <sup>-/-</sup> |                   |
| <b>Expert 1</b>         |          |                     |                     |                     |                     |                     |                     |                     |                     |                     |                     |                   |
| <b>d1</b><br>( $\mu$ m) | Section1 | 539.56              | 430.83              | 494.04              | 439.24              | 484.56              | 467.70              | 460.42              | 370.85              | 582.06              | 482.09              | <b>0.00001 **</b> |
|                         | Section2 | 507.35              | 417.62              | 477.64              | 427.49              | 470.54              | 462.40              | 444.07              | 396.12              | 537.89              | 420.00              |                   |
|                         | Section3 | 559.73              | 410.76              | 531.60              | 416.65              | 481.26              | 464.10              | 448.82              | 270.45              | 532.01              | 407.67              |                   |
| <b>d2</b><br>( $\mu$ m) | Section1 | 608.89              | 496.80              | 536.04              | 416.15              | 506.87              | 497.80              | 468.25              | 383.84              | 581.28              | 505.56              | <b>0.00004 **</b> |
|                         | Section2 | 567.11              | 494.62              | 580.97              | 463.60              | 484.77              | 487.69              | 461.89              | 417.95              | 535.26              | 509.69              |                   |
|                         | Section3 | 574.08              | 434.10              | 564.94              | 416.18              | 541.19              | 434.00              | 425.55              | 377.96              | 510.70              | 444.90              |                   |
| <b>r1</b><br>( $\mu$ m) | Section1 | 253.62              | 315.56              | 253.62              | 333.43              | 152.09              | 285.81              | 131.75              | 356.98              | 489.63              | 395.94              | <b>0.00445 **</b> |
|                         | Section2 | 242.13              | 352.30              | 242.13              | 314.31              | 166.74              | 297.59              | 167.84              | 318.95              | 474.67              | 370.93              |                   |
|                         | Section3 | 260.09              | 353.08              | 260.09              | 351.72              | 159.37              | 277.10              | 126.43              | 360.40              | 433.02              | 377.27              |                   |
| <b>r2</b><br>( $\mu$ m) | Section1 | 61.72               | 137.31              | 61.72               | 142.46              | 27.94               | 111.96              | 35.57               | 108.26              | 68.50               | 163.00              | <b>0.00003 **</b> |
|                         | Section2 | 63.81               | 116.90              | 63.81               | 139.78              | 48.28               | 107.39              | 43.19               | 120.51              | 66.07               | 157.50              |                   |
|                         | Section3 | 66.06               | 116.73              | 66.06               | 172.94              | 53.35               | 101.81              | 43.19               | 118.32              | 64.65               | 170.30              |                   |
| <b>Expert 2</b>         |          |                     |                     |                     |                     |                     |                     |                     |                     |                     |                     |                   |
| <b>d1</b><br>( $\mu$ m) | Section1 | 529.66              | 431.91              | 482.04              | 430.18              | 478.68              | 455.64              | 472.13              | 350.64              | 583.06              | 470.67              | <b>0.00004 **</b> |
|                         | Section2 | 543.56              | 411.86              | 539.55              | 421.66              | 498.29              | 382.47              | 478.54              | 469.43              | 627.06              | 460.97              |                   |
|                         | Section3 | 575.63              | 372.20              | 765.87              | 417.68              | 493.55              | 451.34              | 439.37              | 300.39              | 574.94              | 468.98              |                   |
| <b>d2</b><br>( $\mu$ m) | Section1 | 656.01              | 442.12              | 545.45              | 406.20              | 552.24              | 502.86              | 518.37              | 459.56              | 604.80              | 510.91              | <b>0.00001 **</b> |
|                         | Section2 | 578.58              | 511.04              | 614.04              | 520.80              | 509.50              | 478.95              | 425.55              | 412.17              | 571.81              | 526.14              |                   |
|                         | Section3 | 613.61              | 373.40              | 604.75              | 470.22              | 564.01              | 424.54              | 441.14              | 414.47              | 475.52              | 414.73              |                   |
| <b>r1</b><br>( $\mu$ m) | Section1 | 259.98              | 346.97              | 199.36              | 328.92              | 199.32              | 279.94              | 121.89              | 310.39              | 532.40              | 396.75              | <b>0.00401 **</b> |
|                         | Section2 | 266.80              | 314.83              | 205.22              | 324.53              | 172.68              | 296.50              | 143.62              | 282.44              | 475.38              | 365.27              |                   |
|                         | Section3 | 235.67              | 366.30              | 153.75              | 269.73              | 148.15              | 281.83              | 113.28              | 326.01              | 434.92              | 373.14              |                   |
| <b>r2</b><br>( $\mu$ m) | Section1 | 63.51               | 140.30              | 67.27               | 158.72              | 47.56               | 106.71              | 43.19               | 135.19              | 90.75               | 183.27              | <b>0.00003 **</b> |
|                         | Section2 | 66.34               | 108.27              | 73.68               | 151.16              | 56.86               | 101.81              | 63.79               | 115.79              | 97.32               | 168.74              |                   |
|                         | Section3 | 55.89               | 146.72              | 58.45               | 106.74              | 50.01               | 94.20               | 45.73               | 139.38              | 89.12               | 186.26              |                   |

Table S3. Summary statistics of *Lhx2* gene expression levels in spinal cord sections of PAS1<sup>w/w</sup> E11.5 mouse embryos. Images of spinal cord sections of E11.5 PAS1<sup>m/m</sup> (wild-type) and PAS1<sup>w/w</sup> embryos immuno-stained for LHX2 after CUBIC clearing were captured and analyzed with the Vision4D software (version 2.12.3, Arivis). Three groups of embryos were examined, and each group of embryos was from age-matched littermates. Three consecutive sections of each embryo were examined. d1 and d2 define the width of the areas with LHX2 protein expression. r1 and r2 denote the distances of the areas with LHX2 protein expression away from the dorsal vertex of the spinal cord. Measurements were conducted by two experts independently, and results are presented in the following two sub-tables. Two-tailed permutation test was used, \**P* < 0.05, \*\**P* < 0.01.

|                                |          | Group A             |                     | Group B             |                     | Group C             |                     | P-value           |
|--------------------------------|----------|---------------------|---------------------|---------------------|---------------------|---------------------|---------------------|-------------------|
|                                |          | PAS1 <sup>m/m</sup> | PAS1 <sup>w/w</sup> | PAS1 <sup>m/m</sup> | PAS1 <sup>w/w</sup> | PAS1 <sup>m/m</sup> | PAS1 <sup>w/w</sup> |                   |
| <b>Expert 1</b>                |          |                     |                     |                     |                     |                     |                     |                   |
| <b>d1</b><br>( $\mu\text{m}$ ) | Section1 | 512.05              | 446.78              | 645.23              | 403.00              | 532.79              | 548.83              | <b>0.08092</b>    |
|                                | Section2 | 558.82              | 417.99              | 647.42              | 397.57              | 600.04              | 638.70              |                   |
|                                | Section3 | 556.00              | 391.57              | 602.79              | 380.79              | 579.55              | 561.50              |                   |
| <b>d2</b><br>( $\mu\text{m}$ ) | Section1 | 617.43              | 380.64              | 648.93              | 459.64              | 542.19              | 626.77              | <b>0.08068</b>    |
|                                | Section2 | 531.43              | 462.33              | 680.30              | 416.86              | 575.26              | 575.73              |                   |
|                                | Section3 | 586.85              | 444.22              | 642.15              | 435.91              | 544.53              | 595.07              |                   |
| <b>r1</b><br>( $\mu\text{m}$ ) | Section1 | 539.57              | 630.17              | 322.17              | 342.87              | 292.01              | 384.59              | <b>0.00465 **</b> |
|                                | Section2 | 487.55              | 612.02              | 290.03              | 305.63              | 264.44              | 385.46              |                   |
|                                | Section3 | 447.78              | 534.52              | 291.35              | 359.43              | 253.72              | 367.33              |                   |
| <b>r2</b><br>( $\mu\text{m}$ ) | Section1 | 54.82               | 193.13              | 45.98               | 150.92              | 53.35               | 119.65              | <b>0.00543 **</b> |
|                                | Section2 | 43.66               | 175.52              | 53.57               | 160.98              | 76.23               | 122.42              |                   |
|                                | Section3 | 40.28               | 154.95              | 53.67               | 166.35              | 66.05               | 96.65               |                   |
| <b>Expert 2</b>                |          |                     |                     |                     |                     |                     |                     |                   |
| <b>d1</b><br>( $\mu\text{m}$ ) | Section1 | 629.95              | 368.60              | 708.30              | 446.72              | 521.27              | 508.43              | <b>0.00513 **</b> |
|                                | Section2 | 554.77              | 324.79              | 667.57              | 431.84              | 609.81              | 515.76              |                   |
|                                | Section3 | 630.44              | 401.84              | 605.03              | 353.81              | 576.36              | 555.17              |                   |
| <b>d2</b><br>( $\mu\text{m}$ ) | Section1 | 743.56              | 520.68              | 680.43              | 474.58              | 454.84              | 652.03              | <b>0.00469 **</b> |
|                                | Section2 | 532.03              | 507.15              | 664.14              | 427.24              | 521.73              | 512.31              |                   |
|                                | Section3 | 649.75              | 431.86              | 669.80              | 417.93              | 496.01              | 611.85              |                   |
| <b>r1</b><br>( $\mu\text{m}$ ) | Section1 | 521.03              | 630.17              | 291.93              | 309.32              | 297.49              | 337.34              | <b>0.00401 **</b> |
|                                | Section2 | 483.39              | 621.99              | 262.32              | 305.57              | 242.40              | 350.87              |                   |
|                                | Section3 | 445.59              | 528.85              | 236.00              | 335.22              | 231.50              | 333.03              |                   |
| <b>r2</b><br>( $\mu\text{m}$ ) | Section1 | 76.11               | 155.01              | 73.56               | 180.61              | 92.12               | 121.37              | <b>0.00551 **</b> |
|                                | Section2 | 70.72               | 167.68              | 73.12               | 168.56              | 78.97               | 129.87              |                   |
|                                | Section3 | 68.70               | 150.88              | 66.70               | 182.32              | 84.23               | 114.84              |                   |

Table S4. Summary statistics of *Lhx2* gene expression levels in spinal cord sections of PAS1<sup>c/c</sup> E11.5 mice embryos. Images of spinal cord sections of E11.5 PAS1<sup>m/m</sup> (wild-type) and PAS1<sup>c/c</sup> embryos immuno-stained for LHX2 after CUBIC clearing were captured and analyzed with the Vision4D software (version 2.12.3, Arivis). Three groups of embryos were collected, and each group of embryos was from age-matched littermates. Three consecutive sections of each embryo were examined. d1 and d2 define the width of the areas with LHX2 protein expression. r1 and r2 denote the distances of the areas with LHX2 protein expression away from the dorsal vertex of the spinal cord. Measurements were conducted by two experts independently, and results are presented in the following two sub-tables. Two-tailed permutation test was used, \**P* < 0.05, \*\**P* < 0.01.

|                         |          | Group A             |                     | Group B             |                     | Group C             |                     | P-value           |
|-------------------------|----------|---------------------|---------------------|---------------------|---------------------|---------------------|---------------------|-------------------|
|                         |          | PAS1 <sup>m/m</sup> | PAS1 <sup>c/c</sup> | PAS1 <sup>m/m</sup> | PAS1 <sup>c/c</sup> | PAS1 <sup>m/m</sup> | PAS1 <sup>c/c</sup> |                   |
| <b>Expert 1</b>         |          |                     |                     |                     |                     |                     |                     |                   |
| <b>d1</b><br>( $\mu$ m) | Section1 | 447.39              | 329.85              | 613.81              | 340.18              | 548.26              | 454.95              | <b>0.00561 **</b> |
|                         | Section2 | 360.18              | 300.99              | 552.89              | 425.39              | 578.09              | 402.69              |                   |
|                         | Section3 | 395.50              | 279.46              | 570.85              | 382.50              | 554.51              | 434.37              |                   |
| <b>d2</b><br>( $\mu$ m) | Section1 | 479.68              | 402.71              | 630.48              | 321.16              | 603.36              | 463.33              | <b>0.00527 **</b> |
|                         | Section2 | 420.08              | 380.98              | 547.54              | 414.26              | 585.54              | 481.43              |                   |
|                         | Section3 | 368.65              | 300.09              | 577.24              | 445.73              | 528.37              | 482.88              |                   |
| <b>r1</b><br>( $\mu$ m) | Section1 | 97.26               | 258.24              | 336.25              | 458.48              | 156.00              | 320.50              | <b>0.00492 **</b> |
|                         | Section2 | 83.00               | 256.39              | 341.98              | 465.72              | 180.02              | 339.66              |                   |
|                         | Section3 | 98.74               | 268.99              | 301.19              | 482.01              | 162.02              | 292.31              |                   |
| <b>r2</b><br>( $\mu$ m) | Section1 | 37.91               | 162.56              | 64.74               | 178.73              | 58.44               | 159.70              | <b>0.00506 **</b> |
|                         | Section2 | 43.20               | 146.49              | 72.24               | 144.85              | 60.62               | 163.56              |                   |
|                         | Section3 | 35.57               | 169.43              | 66.36               | 129.95              | 51.15               | 155.89              |                   |
| <b>Expert 2</b>         |          |                     |                     |                     |                     |                     |                     |                   |
| <b>d1</b><br>( $\mu$ m) | Section1 | 461.63              | 368.90              | 600.44              | 357.35              | 578.65              | 436.46              | <b>0.00475 **</b> |
|                         | Section2 | 411.37              | 356.28              | 510.31              | 350.69              | 592.05              | 391.90              |                   |
|                         | Section3 | 408.59              | 429.95              | 583.41              | 339.36              | 552.68              | 423.07              |                   |
| <b>d2</b><br>( $\mu$ m) | Section1 | 487.84              | 380.99              | 664.64              | 334.8               | 612.24              | 532.67              | <b>0.33588</b>    |
|                         | Section2 | 468.05              | 403.48              | 582.39              | 405.96              | 562.76              | 556.23              |                   |
|                         | Section3 | 363.75              | 682.42              | 567.68              | 455.13              | 537.00              | 463.04              |                   |
| <b>r1</b><br>( $\mu$ m) | Section1 | 56.76               | 276.06              | 347.75              | 462.42              | 150.19              | 331.35              | <b>0.00544 **</b> |
|                         | Section2 | 40.03               | 284.21              | 345.64              | 478.24              | 162.18              | 326.84              |                   |
|                         | Section3 | 35.75               | 273.09              | 307.92              | 478.54              | 162.02              | 314.14              |                   |
| <b>r2</b><br>( $\mu$ m) | Section1 | 48.48               | 199.18              | 67.27               | 213.48              | 80.75               | 185.69              | <b>0.00504 **</b> |
|                         | Section2 | 26.87               | 215.29              | 83.85               | 179.20              | 91.68               | 213.69              |                   |
|                         | Section3 | 22.87               | 189.90              | 83.85               | 190.30              | 83.82               | 203.44              |                   |

Table S5. Results of social dominance tube test of PAS1<sup>w/m</sup> vs. PAS1<sup>w/w</sup> mice.

| Cage number <sup>a</sup> | No. of PAS1 <sup>w/m</sup> vs. No. of PAS1 <sup>w/w</sup> | Winning rate of PAS1 <sup>w/m</sup> | Winning rate of PAS1 <sup>w/w</sup> | Age at group-housing (weeks) | Weight at group-housing (g) | Housed before tube test (weeks) <sup>b</sup> | Age at tube test (weeks) | Weight at tube test (g) |
|--------------------------|-----------------------------------------------------------|-------------------------------------|-------------------------------------|------------------------------|-----------------------------|----------------------------------------------|--------------------------|-------------------------|
| Cage 1                   | 2:2                                                       | 100%                                | 0%                                  | 7.7                          | 19.5-21.7                   | 5.0                                          | 12.7                     | 22.8-24.0               |
| Cage 2                   | 2:2                                                       | 100%                                | 0%                                  | 7.4                          | 19.8-22.3                   | 5.0                                          | 12.4                     | 24.0-25.6               |
| Cage 3                   | 2:2                                                       | 50%                                 | 50%                                 | 7.4-7.7                      | 22.1-23.8                   | 5.0                                          | 12.4-12.7                | 26.3-29.3               |
| Cage 4                   | 2:2                                                       | 50%                                 | 50%                                 | 7.4-7.7                      | 21.0-22.5                   | 5.0                                          | 12.4-12.7                | 24.4-27.8               |
| Cage 5                   | 2:2                                                       | 100%                                | 0%                                  | 10.4                         | 22.6-24.2                   | 2.7                                          | 13.1                     | 23.8-28.2               |
| Cage 6                   | 2:2                                                       | 100%                                | 0%                                  | 10.4                         | 24.2-26.7                   | 2.7                                          | 13.1                     | 24.5-27.3               |
| Cage 7                   | 2:2                                                       | 100%                                | 0%                                  | 7.7-8.4                      | 19.5-23.4                   | 3.1                                          | 10.9-11.6                | 22.2-26.8               |
| Cage 8                   | 3:3                                                       | 67%                                 | 33%                                 | 8.9-9.7                      | 23.0-26.4                   | 2.1                                          | 11.0-11.9                | 24.7-27.9               |
| Cage 9                   | 4:4                                                       | 69%                                 | 31%                                 | 12.7-13.0                    | 24.0-27.8                   | 3.6                                          | 16.3-16.6                | 27.2-30.6               |
| Cage 10                  | 4:4                                                       | 69%                                 | 31%                                 | 14.7-15.0                    | 25.0-30.3                   | 3.6                                          | 18.3-18.6                | 27.0-30.1               |
| Cage 11                  | 4:4                                                       | 81%                                 | 19%                                 | 9.7-10.4                     | 21.3-24.3                   | 4.1                                          | 13.9-14.6                | 22.5-28.7               |
| Summary                  |                                                           | 75.6%                               | 24.4%                               |                              |                             |                                              |                          |                         |

<sup>a</sup>Male mice with the same genotype were not paired. There were no female mice in cages 1 to 4.

<sup>b</sup>The exact time to acquire a stable rank was not examined in this study, but it was known to be less than the duration of housing time before tube test.



Table S6. Results of social dominance tube test of PAS1<sup>c/m</sup> vs. PAS1<sup>c/c</sup> mice.

| Cage number <sup>a</sup> | No. of PAS1 <sup>c/m</sup> vs. No. of PAS1 <sup>c/c</sup> | Winning rate of PAS1 <sup>c/m</sup> | Winning rate of PAS1 <sup>c/c</sup> | Age at group-housing (weeks) | Weight at group-housing (g) | Housed before tube test (weeks) <sup>b</sup> | Age at tube test (weeks) | Weight at tube test (g) |
|--------------------------|-----------------------------------------------------------|-------------------------------------|-------------------------------------|------------------------------|-----------------------------|----------------------------------------------|--------------------------|-------------------------|
| Cage 1                   | 2:2                                                       | 0%                                  | 100%                                | 11.6-11.7                    | 24.8-27.3                   | 3.4                                          | 15.0-15.1                | 27.4-29.6               |
| Cage 2                   | 2:2                                                       | 0%                                  | 100%                                | 11.6-11.7                    | 23.2-24.6                   | 3.4                                          | 15.0-15.1                | 22.8-26.5               |
| Cage 3                   | 2:2                                                       | 0%                                  | 100%                                | 9.6-9.9                      | 23.0-24.4                   | 3.3                                          | 12.9-13.1                | 25.8-26.9               |
| Cage 4                   | 2:2                                                       | 0%                                  | 100%                                | 9.6-9.9                      | 19.7-22.6                   | 3.3                                          | 12.9-13.1                | 23.1-25.5               |
| Cage 5                   | 2:2                                                       | 0%                                  | 100%                                | 9.1-9.6                      | 18.8-22.1                   | 3.1                                          | 12.3-12.7                | 22.5-24.6               |
| Cage 6                   | 2:2                                                       | 0%                                  | 100%                                | 9.1                          | 21.2-23.4                   | 3.9                                          | 13.0                     | 23.0-26.3               |
| Cage 7                   | 2:2                                                       | 0%                                  | 100%                                | 9.1                          | 20.1-21.1                   | 3.9                                          | 13.0                     | 22.5-23.6               |
| Summary                  |                                                           | 0.0%                                | 100.0%                              |                              |                             |                                              |                          |                         |

<sup>a</sup>Male mice with the same genotype were not paired.

<sup>b</sup>The exact time to acquire a stable rank was not examined in this study, but it was known to be less than the duration of housing time before tube test.

Table S7. Results of social dominance tube test of PAS1<sup>-m</sup> vs. PAS1<sup>-/-</sup> mice.

| Cage number | No. of PAS1 <sup>-m</sup> vs. No. of PAS1 <sup>-/-</sup> | Winning rate of PAS1 <sup>-m</sup> | Winning rate of PAS1 <sup>-/-</sup> | Age at group-housing (weeks) | Weight at group-housing (g) | Housed before test (weeks) | Age at tube test (weeks) | Weight at tube test (g) | Time to achieve stable social hierarchy      |
|-------------|----------------------------------------------------------|------------------------------------|-------------------------------------|------------------------------|-----------------------------|----------------------------|--------------------------|-------------------------|----------------------------------------------|
| Cage 1      | 2:2                                                      | 73%                                | 27%                                 | 9.4-11.1                     | 23.8-25.4                   | 4.3                        | 13.7-15.4                | 27.1-29.7               | Unstable during the examined period of time. |
| Cage 2      | 2:2                                                      | 45%                                | 55%                                 | 9.4-9.6                      | 21.9-23.5                   | 4.3                        | 13.7-13.9                | 24.2-28.9               |                                              |
| Cage 3      | 2:2                                                      | 58%                                | 42%                                 | 9.4                          | 22.8-24.5                   | 2.7                        | 12.1                     | 24.5-26.1               |                                              |
| Cage 4      | 2:2                                                      | 68%                                | 32%                                 | 7.9-8.7                      | 21.1-22.5                   | 4.0                        | 11.9-12.7                | 23.7-25.2               |                                              |
| Cage 5      | 2:2                                                      | 38%                                | 62%                                 | 7.9-8.1                      | 22.6-24.7                   | 4.0                        | 11.9-12.1                | 25.7-28.8               |                                              |
| Cage 6      | 2:2                                                      | 88%                                | 12%                                 | 7.9-8.7                      | 23.1-25.7                   | 4.0                        | 11.9-12.7                | 26.9-29.9               |                                              |
| Summary     |                                                          | 58.8%                              | 41.2%                               |                              |                             |                            |                          |                         |                                              |

Male mice with the same genotype were not paired.  
 Average winning rates of PAS1<sup>-m</sup> and PAS1<sup>-/-</sup> in 10 consecutive days are shown.

Table S8. Results of social dominance tube test of PAS1<sup>-/-</sup> mice.

| Cage number | No. of PAS1 <sup>-/-</sup> | Age at group-housing (weeks) | Weight at group-housing (g) | Housed before tube test (weeks) | Age at tube test (weeks) | Weight at tube test (g) | Time to achieve stable social hierarchy      |
|-------------|----------------------------|------------------------------|-----------------------------|---------------------------------|--------------------------|-------------------------|----------------------------------------------|
| Cage 1      | 4                          | 9.3-9.9                      | 22.4-24.1                   | 3.7                             | 13.0-13.6                | 25.9-28.1               | Unstable during the examined period of time. |
| Cage 2      | 4                          | 9.3-9.9                      | 24.0-25.4                   | 3.7                             | 13.0-13.6                | 27.7-29.5               |                                              |
| Cage 3      | 4                          | 9.3-9.9                      | 25.5-26.0                   | 3.7                             | 13.0-13.6                | 27.7-28.7               |                                              |

Table S9. List of primers.

| Experiments                           | Primers                                                                                              | Note                                                                 |
|---------------------------------------|------------------------------------------------------------------------------------------------------|----------------------------------------------------------------------|
| Cell transfection                     | hPAS1_Fx:CCGctcgagCTGCCTAGGAAGAGGAAGGA<br>hPAS1_Rx:CCGctcgagAACCTGCCTTTTGTGGGAGG                     |                                                                      |
|                                       | mPAS1_Fx:CCGctcgagCTGCCTAGGAAGAGGAAGGA<br>mPAS1_Rx:CCGctcgagACCCTGTGTTTTGTGGAAGG                     |                                                                      |
|                                       | cowPAS1_Fx:CCGctcgagCTGCCTAGGAAAAGGAAAAGA<br>cowPAS1_Rx:CCGctcgagAACCTGCCTTCTGTGGGAGG                | XhoI site built in                                                   |
|                                       | wPAS1_Fx:CCGctcgagTTGCCTATAAAAATGAAGGA<br>wPAS1_Rx:CCGctcgagAACCTGTATTTTGTAGTAGG                     |                                                                      |
|                                       | cPAS1_Fx:CCGctcgagTTGCCTATAAAAAGAAGAA<br>cPAS1_Rx:CCGctcgagAACCTGTATTTTGTATAGG                       |                                                                      |
|                                       | miniPro_F:agcttTAGAGGGTATATAATGGAAGCTCGACTTCCAGA<br>miniPro_R:agcttCTGGAAGTCGAGCTTCCATTATATACCCTCTAA | HindIII site built in                                                |
|                                       | RVP3_F:CTAGCAAAATAGGCTGTCCC<br>PGL411_R:CCATGGTGGCTTTACCAACA                                         | For verification of uptake of the plasmid carrying the reporter gene |
|                                       | hPAS1_Fs:ACGCgtcgacCTGCCTAGGAAGAGGAAGGA<br>hPAS1_Rs:ACGCgtcgacAACCTGCCTTTTGTGGGAGG                   |                                                                      |
|                                       | cPAS1_Fs:ACGCgtcgacTTGCCTATAAAAAAGAAGAA<br>cPAS1_Rs:ACGCgtcgacAACCTGTATTTTGTATAGG                    | Sall site built in                                                   |
|                                       | CF:TGCGGGCCTCTTCGCTATTA<br>CR:TGAGGAGCAGTCTTTGATT                                                    | For verification of uptake of the plasmid carrying the reporter gene |
| Genotyping of ES cell targeting mouse | KO_P1:CATACTCCAAGAGTAACATCCCTGC<br>KO_P2:GAATCGCCAACTAATTGACGCTGCA<br>KO_P3:AGAGAATAGGAACTTCGTACCC   | For PAS1 <sup>-</sup> model                                          |
|                                       | KI_P1:TTGTTCTGAGTTAGTCACGGTGGCC<br>KI_P2:GGGTACGAAGTTCCCTATTCTCT<br>KI_P3:AAACGCAGCCTAGAGAAATGCA     | For PAS1 <sup>w</sup> and PAS1 <sup>c</sup> models                   |
|                                       | InternalControl_F:CAACCACTTACAAGAGACCCGTA<br>InternalControl_R:GAGCCCTTAGAAATAACGTTCCACC             |                                                                      |
|                                       | Lhx2_F:GCCGAGAAAGCGCAAGAGT<br>Lhx2_R:TGTTCAGCATCGTTCTCGTTACA                                         |                                                                      |
|                                       | Lhx2_203F: GCTGCCGAGGGCTCACGAAG<br>Lhx2_203R: CTGCCAGCAGGTAGTAGCGG<br>Gapdh_F:CGTGTTCTACCCCAATGT     |                                                                      |
| RT-qPCR                               |                                                                                                      |                                                                      |

---

Gapdh\_R: TGTCATCATACTTGGCAGGTTTCT

---

Gm27197\_F: AAGCGGGCGCCCAGATTCT

Gm27197\_R: CGCAGAGCCCTCCAGGATG

---

Dennd1a\_F: TTTGATGACCTCCAGAGCCT

Dennd1a\_R: CATCACCTGTGGTTGTAGAG

---

Table S10. Key resources table

| REAGENT or RESOURCE                                | SOURCE            | IDENTIFIER                   |
|----------------------------------------------------|-------------------|------------------------------|
| <b>Antibodies</b>                                  |                   |                              |
| Anti-LHX2 Antibody                                 | Millipore         | ABE1402<br>(RRID:AB_2722523) |
| ALEXA FLUOR 488 goat anti-rabbit IgG (H+L)         | Thermo Scientific | A11034<br>(RRID:AB_2576217)  |
| <b>Chemicals</b>                                   |                   |                              |
| N,N,N',N'-Tetrakis(2-Hydroxypropyl)ethylenediamine | ALDRICH           | 122262                       |
| Agarose                                            | Biowest           | 111860                       |
| MEM, NEAA, powder                                  | Gibco             | 41500034                     |
| Trypsin (0.25%), phenol red                        | Gibco             | 15050057                     |
| Opti-MEM® I Reduced Serum Medium                   | Gibco             | 51985042                     |
| PureLink® Quick Plasmid Miniprep Kit               | Invitrogen        | K210010                      |
| SlowFade® Diamond Antifade Mountant with DAPI      | Molecular Probes  | S36964                       |
| FuGENE® HD Transfection Reagent                    | Promega           | E2311                        |
| Dual-Glo® Luciferase Assay System                  | Promega           | E2920                        |
| Dual-Luciferase® Reporter Assay System             | Promega           | E1910                        |
| HiSpeed Plasmid Maxi Kit (25)                      | Qiagen            | 12663                        |
| QIAGEN Plasmid Mini Kit (25)                       | Qiagen            | 12123                        |
| Tissue-Tek® O.C.T. Compound                        | SAKURA            | 4583                         |
| Paraformaldehyde                                   | Sangon            | A500684                      |
| Fetal Bovine Serum                                 | SIGMA             | 12007C                       |
| Fast Green FCF Dye                                 | SIGMA             | F7252                        |
| Triton™ X-100                                      | SIGMA             | T9284                        |
| 4', 6-Diamidino-2-phenylindole dihydrochloride     | SIGMA             | D8417-1MG                    |
| Takara MiniBEST Agarose Gel DNA Extraction Kit     | TaKaRa            | 9762                         |
| MiniBEST Universal RNA Extraction Kit              | TaKaRa            | 9767                         |
| PrimeScript RT-PCR Kit                             | TaKaRa            | RR014A                       |
| Takara Ex Taq® Hot Start Version                   | TaKaRa            | RR006A                       |
| FastDigest® HindIII                                | Thermo Scientific | FD0504                       |
| FastDigest® XhoI                                   | Thermo Scientific | FD0694                       |
| FastAP Thermosensitive Alkaline Phosphatase        | Thermo Scientific | EF0654                       |
| GeneGreen Nucleic Acid Dye                         | TIANGEN           | RT210                        |
| DNA Marker I                                       | TIANGEN           | MD101-02                     |
| T4 DNA Ligase                                      | TIANGEN           | RT406                        |
| DH5α                                               | TIANGEN           | CB101-01                     |
| TIANquick Midi Purification Kit                    | TIANGEN           | DP204                        |
| RNAstore Reagent                                   | TIANGEN           | DP408-02                     |
| pGM-T Cloning Kit                                  | TIANGEN           | VT202-01                     |
| TransStart® FastPfu DNA Polymerase                 | TransGen          | AP221                        |

|                                                                          |                                                                               |                                                                               |
|--------------------------------------------------------------------------|-------------------------------------------------------------------------------|-------------------------------------------------------------------------------|
| Trans1-T1 Phage Chemically Competent Cell                                | TransGen                                                                      | CD501                                                                         |
| TransScript® II All-in-One First-Strand cDNA Synthesis SuperMix for qPCR | TransGen                                                                      | AH341-01                                                                      |
| TransStart® Top Green qPCR SuperMix                                      | TransGen                                                                      | AQ131-02                                                                      |
| Bovine Serum Albumin , Lyophilized Powde                                 | VETEC                                                                         | V900933                                                                       |
| Sucrose                                                                  | VETEC                                                                         | V900116                                                                       |
| Urea                                                                     | VETEC                                                                         | V900119                                                                       |
| Triethanolamine                                                          | VETEC                                                                         | V900257                                                                       |
| <b>Consumables</b>                                                       |                                                                               |                                                                               |
| Thermo Scientific™ Nunc™                                                 | Thermo Scientific                                                             | 142475                                                                        |
| Assay Plate, 96 Well, No Lid                                             | COSTAR                                                                        | 3362                                                                          |
| LightCycler® 480 Multiwell Plate 96, white                               | Roche                                                                         | 04729692001                                                                   |
| 4IN THINWALL GL 1.0 OD/.75 ID                                            | WPI                                                                           | TW100F-4                                                                      |
| Microloader 20µl                                                         | Eppendorf                                                                     | 5242856.003                                                                   |
| <b>Equipments</b>                                                        |                                                                               |                                                                               |
| Microplate reader                                                        | Bio-Tek                                                                       | Synergy H1                                                                    |
| Inverted fluorescence Microscope                                         | Zeiss                                                                         | Axio observer Z1                                                              |
| Micropipette Puller                                                      | SUTTER<br>INSTRUMENT                                                          | MODEL P-2000                                                                  |
| Microinjection pump                                                      | HARVARD<br>APPARATUS                                                          | Pump 11 Elite                                                                 |
| Stereoscopic microscope                                                  | Zeiss                                                                         | Stemi 2000-C                                                                  |
| 3mm-diameter L-shaped electrode                                          | BEX                                                                           | LF613P3                                                                       |
| In vivo electroporator                                                   | BEX                                                                           | CUY21EDIT II                                                                  |
| Stereo fluorescence microscope                                           | Zeiss                                                                         | AXIO Zoom.V16                                                                 |
| Real-time quantitative PCR instrument                                    | Roche                                                                         | LightCycler® 480                                                              |
| Light sheet fluorescence microscopy                                      | Zeiss                                                                         | Lightsheet Z.1                                                                |
| Rota-rod                                                                 | Shanghai Mobile<br>Datum Information<br>Technology<br>Co.,LTD / Ugo<br>basile | RD1123RS-G / Code:<br>47650                                                   |
| <b>Experimental Models: Organisms/Strains</b>                            |                                                                               |                                                                               |
| Mouse: FVB (transgenic mouse enhancer assays)                            | Cyagen                                                                        | <a href="http://www.cyagen.com/us/en/">http://www.cyagen.com/us/en/</a>       |
|                                                                          | Cyagen                                                                        | <a href="http://www.cyagen.com/us/en/">http://www.cyagen.com/us/en/</a>       |
| Mouse: C57BL/6                                                           | Shanghai Model<br>Organisms<br>Center,Inc                                     | <a href="http://www.shmo.com.cn/English/">http://www.shmo.com.cn/English/</a> |

|                                                                 |                               |                                                                   |
|-----------------------------------------------------------------|-------------------------------|-------------------------------------------------------------------|
| Mouse: C57BL/6 PAS1 <sup>-/-</sup> (mouse PAS1 knock-out)       | This project<br>(donated)     | NM-KO-190421                                                      |
| Mouse: C57BL/6 PAS1 <sup>w/w</sup> (wallaby PAS1 knock-in)      |                               | NM-KI-190001                                                      |
| Mouse: C57BL/6 PAS1 <sup>c/c</sup> (chicken PAS1 knock-in)      |                               | NM-KI-190002                                                      |
| <b>Plasmids for cell and chicken embryos transfection</b>       |                               |                                                                   |
| pGL4.11 vector                                                  | Promega                       | E6661                                                             |
| pGL4.74 reporter vector                                         | Promega                       | E6921                                                             |
| miniPro-pGL4.11 reporter vector (miniPro-luc2P)                 |                               |                                                                   |
| hPAS1-miniPro-pGL4.11 reporter vector                           |                               |                                                                   |
| mPAS1-minoPro-pGL4.11 reporter vector                           | This project                  | N/A                                                               |
| cowPAS1-miniPro-pGL4.11 reporter vector                         |                               |                                                                   |
| wPAS1-miniPro-pGL4.11 reporter vector                           |                               |                                                                   |
| cPAS1-miniPro-pGL4.11 reporter vector                           |                               |                                                                   |
| PUC19 reporter vector                                           | TransGen                      | N/A                                                               |
| pCAG-mCherry reporter vector                                    | Addgene                       | 41583<br>(RRID:Addgene_41583)                                     |
| pCAG-EGFP reporter vector                                       | This project                  | N/A                                                               |
| TK-EGFP reporter vector                                         | Provided by Dr.<br>Naihe Jing | N/A                                                               |
| TK-mCherry reporter vector                                      |                               |                                                                   |
| hPAS1-TK-EGFP reporter vector                                   | This project                  | N/A                                                               |
| cPAS1-TK-mCherry reporter vector                                |                               |                                                                   |
| <b>Oligonucleotides</b>                                         |                               |                                                                   |
| Primers for PAS1, see Table S9                                  | This project                  | N/A                                                               |
| Primers for Genotyping of ES cell targeting mouse, see Table S9 | This project                  | N/A                                                               |
| Primers for RT-qPCR, see Table S9                               | This project                  | N/A                                                               |
| <b>Recombinant DNA</b>                                          |                               |                                                                   |
| Hsp68-LacZ vector                                               |                               |                                                                   |
| hPAS1-Hsp68-LacZ reporter vector                                |                               |                                                                   |
| mPAS1-Hsp68-LacZ reporter vector                                |                               |                                                                   |
| wPAS1-Hsp68-LacZ reporter vector                                | This project                  | N/A                                                               |
| cPAS1-Hsp68-LacZ reporter vector                                |                               |                                                                   |
| ES cell targeting vector, mm9-KOS141218, PAS1 <sup>-</sup>      |                               |                                                                   |
| ES cell targeting vector, mm9-KIS141215, PAS1 <sup>w</sup>      |                               |                                                                   |
| ES cell targeting vector, mm9-galGal3, PAS1 <sup>c</sup>        |                               |                                                                   |
| <b>Cell Lines</b>                                               |                               |                                                                   |
| Mouse: Neuro2a                                                  | Cell Bank of CAS              | TMC29                                                             |
| Human: HEK-293                                                  | Cell Bank of CAS              | GNHu43                                                            |
| <b>Software</b>                                                 |                               |                                                                   |
| KungFuPanda                                                     | This project                  | <a href="http://www.picb.ac.cn/evo">http://www.picb.ac.cn/evo</a> |



---

|                      |        |                                                                                                             |
|----------------------|--------|-------------------------------------------------------------------------------------------------------------|
|                      |        | <a href="http://www.igensoftwares/">igen/softwares/</a>                                                     |
| eGPS <sup>5</sup>    |        | <a href="http://www.egps-software.net/">http://www.egps-software.net/</a>                                   |
| Vision4D 2.12.3      | Arivis | <a href="http://www.arivis.com/">http://www.arivis.com/</a>                                                 |
| BLASTN <sup>12</sup> |        | <a href="https://blast.ncbi.nlm.nih.gov/Blast.cgi">https://blast.ncbi.nlm.nih.gov/Blast.cgi</a>             |
| MULTIZ <sup>13</sup> |        | <a href="http://www.bx.psu.edu/miller_lab">http://www.bx.psu.edu/miller_lab</a>                             |
| UCSC Kent utilities  |        | <a href="http://hgdownload.cse.ucsc.edu/admin/jksrc.zip">http://hgdownload.cse.ucsc.edu/admin/jksrc.zip</a> |

---

## References

- 1 Daily, J. L. *et al.* Adeno-associated virus-mediated rescue of the cognitive defects in a mouse model for Angelman syndrome. *PLoS one* **6**, e27221 (2011).
- 2 Ogawa, N., Hirose, Y., Ohara, S., Ono, T. & Watanabe, Y. A simple quantitative bradykinesia test in MPTP-treated mice. *Res Commun Chem Pathol Pharmacol* **50**, 435-441 (1985).
- 3 Li, W.-H., Ellsworth, D. L., Krushkal, J., Chang, B. H. & Hewett-Emmett, D. Rates of nucleotide substitution in primates and rodents and the generation-time effect hypothesis. *Mol Phylogenet Evol* **5**, 182-187 (1996).
- 4 Saitou, N. & Nei, M. The neighbor-joining method: a new method for reconstructing phylogenetic trees. *Mol Biol Evol* **4**, 406-425 (1987).
- 5 Yu, D. *et al.* eGPS 1.0: comprehensive software for multi-omic and evolutionary analyses. *Natl Sci Rev* **6**, 867-869 (2019).
- 6 Weinreb, C. & Raphael, B. J. Identification of hierarchical chromatin domains. *Bioinformatics* **32**, 1601-1609 (2016).
- 7 Rao, S. S. P. *et al.* A 3D map of the human genome at kilobase resolution reveals principles of chromatin looping. *Cell* **159**, 1665-1680 (2014).
- 8 Kerpedjiev, P. *et al.* HiGlass: web-based visual exploration and analysis of genome interaction maps. *Genome Biol* **19**, 125 (2018).
- 9 Hernandez-Miranda, L. R., Muller, T. & Birchmeier, C. The dorsal spinal cord and hindbrain: From developmental mechanisms to functional circuits. *Dev Biol* **432**, 34-42 (2017).
- 10 Creyghton, M. P. *et al.* Histone H3K27ac separates active from poised enhancers and predicts developmental state. *Proc Natl Acad Sci USA* **107**, 21931-21936 (2010).
- 11 Mele, M. *et al.* The human transcriptome across tissues and individuals. *Science* **348**, 660-665 (2015).
- 12 Altschul, S. F. *et al.* Gapped BLAST and PSI-BLAST: a new generation of protein database search programs. *Nucleic Acids Res* **25**, 3389-3402 (1997).
- 13 Blanchette, M. *et al.* Aligning multiple genomic sequences with the threaded blockset aligner. *Genome Res* **14**, 708-715 (2004).
